1  
2  
3  
4  
5  
6  
7  
8  
9  
10  
11  
12  
13  
14  
15  
16  
17  
18  
19  
20  
21  
22

Radiologist observations of chest X-rays (CXR) predict sputum smear microscopy status in TB  
Portals, a real-world database of tuberculosis (TB) cases

Gabriel Rosenfeld<sup>1\*</sup>, Andrei Gabrielian<sup>1</sup>, Alyssa Meyer<sup>2</sup>, Alex Rosenthal<sup>3</sup>

<sup>1</sup>Bioinformatics and Computational Biosciences Branch, Office of Cyber Infrastructure and Computational Biology, National Institute of Allergy and Infectious Diseases, National Institutes of Health, Bethesda, Maryland, United States of America

<sup>2</sup>Software Engineering Branch, Office of Cyber Infrastructure and Computational Biology, National Institute of Allergy and Infectious Diseases, National Institutes of Health, Bethesda, Maryland, United States of America

<sup>3</sup> Office of Cyber Infrastructure and Computational Biology, National Institute of Allergy and Infectious Diseases, National Institutes of Health, Bethesda, Maryland, United States of America

\* Corresponding author

E-mail: [gabriel.rosenfeld@nih.gov](mailto:gabriel.rosenfeld@nih.gov)

## 23 **Abstract**

24 The Tuberculosis (TB) Portals is an international program of 14 countries connecting clinical,  
25 genomic, and radiologist specialists to develop an openly available repository of deidentified TB  
26 cases with multi-modal data such as case clinical characteristics, pathogen genomics, and  
27 radiomics. This real-world data resource contains over 4000 TB cases, principally drug resistant  
28 cases, with over 4000 chest X-rays (CXR) images. The scope of curated data offers a case-  
29 focused perspective into the drivers of disease incorporating the chronological context of the  
30 presented CXR data. Here, we analyze a cohort consisting of new TB cases to understand the  
31 relationship between baseline sputum microscopy status and nearby Chest X rays images. The  
32 Timika score, a lung biomarker of disease severity, was derived for each CXR using available  
33 radiologist observations. The Timika score along with the radiologist observations were  
34 compared for predictive performance of baseline sputum microscopy status. Baseline sputum  
35 microscopy status is a useful marker of pre-treatment disease severity and infectiousness. The  
36 modeling results support that both the radiologist observations as well as Timika score are  
37 predictive of smear status and that Timika score performs similarly to the top 5 radiologist  
38 features by feature selection. Moreover, inferential statistical analysis identifies the factors  
39 having the greatest association with sputum smear positivity such as presence of radiologist  
40 observations in both lungs, presence of cavity, presence of nodule, and Timika score itself. The  
41 results are consistent with prior reports showing Timika Score utility for predicting baseline  
42 sputum smear and disease status. We report testing of Timika Score on the largest, openly  
43 available real-world dataset of TB cases that can serve as a reference to explore extant and new  
44 TB disease severity scores bridging radiological, microbiological, and clinical data. To illustrate,  
45 we visualize Timika score from images in our database with other cases characteristics

46 demonstrating that this score captures lung biomarker status consistent with known clinical risk  
47 factors.

## 48 **Introduction**

49 Tuberculosis (TB) remains a major global pandemic with approximately 10 million new  
50 cases and 1.5 million deaths each year (1, 2). With the emergence of the SARS-Cov2 global  
51 pandemic in 2020, it is estimated that the TB pandemic may have worsened due to additional  
52 strains and challenges encountered via healthcare systems around the world (3, 4). Concurrent to  
53 those unfortunate events, drug resistant TB continues to be a persistent threat with up to ~20% of  
54 TB isolates around the world estimated to be resistant to a major drug. Transmission of drug  
55 resistant TB is an emerging phenomenon closely monitored by health authorities worldwide (5).  
56 Drug resistant TB cases (DR-TB) are associated with poorer outcomes and more expensive cost  
57 of care when compared to drug sensitive TB. DR-TB has a lower treatment success of  
58 approximately 55% globally and Multi- or Extensively DR-TB care can cost up to 25 times that  
59 of TB cases that are drug sensitive (6, 7). Therefore, real-world databases focusing on these DR  
60 cases that span multi-domain case information are essential to identify novel relationships and  
61 aspects of drug resistance to enable translational medicine to timely and efficiently address drug  
62 resistance.

63 To eradicate TB, clinicians need rapid diagnostics of disease along with efficient means  
64 of monitoring treatment response and completeness at discharge. Sputum smear microscopy has  
65 been a primary method for diagnosis of pulmonary tuberculosis in low and middle income  
66 countries (LMIC) since it is a relatively simple, rapid, and less costly approach that can identify  
67 the most infectious patients and be applied in a variety of socio-economic status areas.  
68 Nonetheless, this approach shows deficiencies in certain demographic groups such as extra-

69 pulmonary TB, pediatric TB, and TB patients simultaneously infected with HIV (8). Moreover,  
70 the requirement for repeated sputum sampling can present obstacles to the application of the  
71 approach as patients may not return for results, are lost to follow up, or have difficulty producing  
72 usable sputum samples. Despite these challenges, it is still widely used throughout LMIC for  
73 disease monitoring and response to therapy (9) as well as having demonstrated some ability to  
74 predict treatment response albeit requiring additional clinical factors (10). Since this  
75 microbiological information is sometimes unavailable or inclusive, it is important to identify  
76 other modalities that may assist with diagnosis or monitoring of treatment response, and one  
77 such approach is imaging of the lungs via Chest X-rays (CXRs).

78 CXR imaging is often collected during TB disease management to understand treatment  
79 response and disease status. Unlike computed tomography (CT) imaging that may not always be  
80 available due to the cost of associated infrastructure (11), CXRs are the primary means of  
81 assessing lung status in LMIC due to their relatively lower costs (12). As such, they are more  
82 widely available to clinicians for assessing lung status during TB disease management and used  
83 as a decision-making clinical information point compared to CTs. Radiologist assessment of  
84 CXRs have been the gold standard reference upon which CXRs have been interpreted for clinical  
85 decision making historically. These observations provide an important lung biomarker that can  
86 inform patient risk, disease severity, and response to treatment over the course of a TB case. For  
87 example, Heo et al. tracked radiological lesions from CXRs over the course of TB treatment in a  
88 prospective cohort analysis showing that presence of cavity or fibrotic lesion associated with  
89 poor radiological response (13). Another example is the development of CXR-derived Timika  
90 Score that has been associated with baseline sputum smear microscopy status and disease  
91 severity in TB cases (14, 15).

92           The National Institute of Allergy and Infectious Diseases (NIAID) Office of Cyber  
93   Infrastructure and Computational Biology leads the transnational partnership of participating  
94   sites covering 14 countries with heavy DR TB burden. This partnership created the TB Portals  
95   to facilitate TB data sharing and science with a goal towards a better understanding of the real-  
96   world aspects of especially problematic DR TB. The TB Portals resource consists of a repository  
97   of TB case data including multiple domains such as case clinical characteristics, pathogen  
98   genomics, and radiomics that can support the biomedical research community's research efforts  
99   towards TB. As of April 2021, the TB Portals database includes over 4000 TB cases, mostly  
100   drug resistant cases, with over 4000 CXRs. Many of these cases also have radiologist  
101   annotations for their CXRs to assess lung biomarker status in relation to the clinical and  
102   microbiological characteristics of the case. While other resources have large numbers of chest  
103   X-ray images, TB Portals provides a TB case-centered repository encapsulating the  
104   chronological context associated with the CXR such as drug resistance status, regimens  
105   administered so far, the genome of the pathogen, and sputum microscopy status. External  
106   collaborators can apply for access to publicly shared data through an online data use agreement  
107   (DUA) and then download this data to facilitate reproducibility and open science.

108           In this study, we utilize the radiologist observations for CXR images in the TB Portals  
109   repository to derive Timika Score (15), a useful numerical lung biomarker, to assess its utility for  
110   predicting sputum smear microscopy status. We compare Timika Score performance with other  
111   features we derived from the radiologist-reported observations to determine if the additional  
112   features could improve upon Timika's previously reported performance. We select a cohort of  
113   cases with a case definition of new containing sputum smear microscopy results from specimens  
114   taken prior to start of treatment, as well as CXRs with radiologist observations within two weeks

115 of the specimen date. We perform inferential statistical analysis of risk of positive sputum  
116 microscopy from presence of various features derived from radiologist observations. We also  
117 examine Timika Score in relation to other aspects of the case such as demographics, case  
118 definition, and outcome. For instance, we utilize a strength of this resource in having a larger  
119 number of mono drug resistant (Mono DR), poly drug resistant (Poly DR), Multi-drug resistant  
120 (MDR) and Extensively drug resistant (XDR) according to WHO guidelines (16).

121 We report results consistent with prior publications regarding the utility of the Timika  
122 score for predicting baseline sputum status. Importantly, we show that Timika Score offers  
123 similar predictive performance compared to the top 5 features we derive from radiologist  
124 observations. These results suggest that Timika Score is well-optimized for determining pre-  
125 treatment disease infectiousness and severity status.

## 126 **Materials and Methods**

### 127 **Computing environment**

128 All analyses were done on a MacBook Pro laptop (x86\_64-apple-darwin15.6.0 (64-bit)  
129 Running under: macOS Mojave 10.14.6) using R version 4.0.2 (2020-06-22) and RStudio  
130 1.2.5033. Specific versions of the R packages can be found in the associated code which  
131 contains renv.lock file listing all used packages and version numbers.

### 132 **Cohort selection**

#### 133 *Sputum Prediction*

134  
135 To remove the potential of confounding lung biomarkers due to prior history of TB, new  
136 cases of TB with CXRs containing radiologist annotations as well as sputum microscopy test

137 results from specimens prior to or on the treatment start date were selected. Those cases where  
138 the specimen collection date was within 14 days of a CXR were included. For cases where  
139 multiple pairs of specimens and CXRs existed, the last specimen prior to treatment was used.  
140 For cases where multiple microscopy test results were present for a specimen, the last  
141 microscopy test result for that specimen was used. For cases where multiple images existed, the  
142 last imaging date was used. Unknown or non-standard microscopy results such as “Unknown  
143 data” and “Saliva” were excluded. Code used for generating the cohort is provided in the Data  
144 availability and code section. Ultimately, 572 new cases were selected from the database with  
145 sputum microscopy results of Negative, 1 to 9 in 100 (1-9/100), 10 to 99 in 100 (1+), 1 to 9 in 1  
146 (2+), 10 to 99 in 1 (3+), and More than 99 in 1 (4+) consisting of 259, 29, 144, 60, 58, and 22  
147 cases respectively within this cohort. The cohort characteristics summarizing case details for the  
148 sputum prediction cohort can be found in Supplementary Table 1.

#### 149 *Analysis of Timika Score with regards to other case characteristics in TB portals*

150 For Figure 1 and Figure 2 visualizing the Timika Score in relation to other case  
151 characteristics, we used all available images with manual radiologist annotations from the  
152 February 2021 release of TB Portals data available for download from Aspera. This included  
153 2058 images from 1761 cases covering not just New cases but all other types in the database.  
154 The characteristics summarizing corresponding case details for the set of available images for the  
155 Timika Score visualizations can be found in Supplementary Table 2.

## 156 **Data preprocessing and extraction of feature set**

157 Data from TB portals was downloaded as a list of .csv files from the Aspera file share  
158 service using the February 2021 version of each respective file. The CXR manual annotations  
159 are provided as a set of features corresponding to observations by radiologists within each

160 sextant of the lungs (dividing each lung by 1/3) as well as a set of features provided at the level  
161 of the entire lung. For those features corresponding to sextant level observations, features where  
162 no observations were provided by radiologists were imputed as 0 (for numerical data  
163 corresponding to between 0-100% involvement of sextant) or “No” (for categorical data  
164 indicating presence/absence of a specific feature within the sextant). The omission of these at  
165 either the level of the entire sextant or specific sextant-level feature are interpreted as the  
166 radiologist did not observe the feature.

167         After imputation, features were converted for tidy-like data processing using packages  
168 from the R tidyverse. This permits various types of downstream feature engineering such as  
169 identification of involvement of one or both lungs by sextant-level feature type, calculation of  
170 summary statistics for numerical features across sextants, and other score calculations such as  
171 Timika Score. For this analysis, involvement of both lungs as well as mean percentage of  
172 sextant involvement across all sextants by specific sextant-level radiologist observation was  
173 calculated along with Timika Score. Both lung features were calculated in a binary manner  
174 where involvement of a left and right sextant for the features was required to indicate  
175 involvement of both lungs for that feature. Timika Score was calculated like the original  
176 publication (15) by a simple method of taking the overall abnormal percent of volume of the  
177 lungs reported by the radiologist and adding 40 if the presence of cavity was indicated in the  
178 radiologist report. Characteristics of derived features by microscopy status can be found in  
179 Supplementary Table 3.

180         MLR3 framework was used to define a set of prediction tasks as well as pipelines for  
181 modeling (17). 70% of the data was selected as a training set and 30% was held out as a  
182 validation set. We tested two distinct prediction tasks in the MLR3 framework: 1) to predict



183 sputum positive (1 to 9 in 100, 1+, or higher) compared to negative and 2) to predict higher  
184 bacterial load positive (2+, 3+, or higher) compared to negative. The positive to negative  
185 prediction task was relatively well balanced between classes; however, the high bacterial load  
186 positive to negative prediction task showed moderate class imbalancing so a class balancing step  
187 was included in some pipelines for comparison. Machine learning (ML) pipelines using all  
188 derived radiological features were compared to pipelines using only the Timika Score for  
189 prediction. For ML pipelines using all derived radiological features, factor data was encoded to  
190 a binary indicator ([https://mlr3pipelines.mlr-org.com/reference/mlr\\_pipeops\\_encode.html](https://mlr3pipelines.mlr-org.com/reference/mlr_pipeops_encode.html)), low  
191 variance features were removed ([https://mlr3pipelines.mlr-](https://mlr3pipelines.mlr-org.com/reference/mlr_pipeops_removeconstants.html)  
192 [org.com/reference/mlr\\_pipeops\\_removeconstants.html](https://mlr3pipelines.mlr-org.com/reference/mlr_pipeops_removeconstants.html)), features were scaled by min-max  
193 scaling ([https://mlr3pipelines.mlr-org.com/reference/mlr\\_pipeops\\_scalerange.html](https://mlr3pipelines.mlr-org.com/reference/mlr_pipeops_scalerange.html)), and the top  
194 5 features were selected via a variety of feature selection methods ([https://mlr3filters.mlr-](https://mlr3filters.mlr-org.com/)  
195 [org.com/](https://mlr3filters.mlr-org.com/)) or Principal Component Analysis ([https://mlr3pipelines.mlr-](https://mlr3pipelines.mlr-org.com/reference/mlr_pipeops_pca.html)  
196 [org.com/reference/mlr\\_pipeops\\_pca.html](https://mlr3pipelines.mlr-org.com/reference/mlr_pipeops_pca.html)). The following ML models were assessed as part of  
197 the pipelines: featureless, glmnet, kkn, multinom, naïve bayes, rpart, ranger, xgboost, svm, and  
198 nnet as described in the subsequent link (<https://mlr3learners.mlr-org.com/reference/index.html>).  
199 For pipelines using only Timika score, only the min-max scaling step was included as part of the  
200 pipeline.

## 201 **Model performance benchmarking**

202 5-fold cross validation was used to assess various binary classification metrics towards  
203 respective prediction tasks on the training set. Both the metrics and the resampling strategies can  
204 be found in the mlr3 documentation (<https://mlr3.mlr-org.com/reference/index.html>) under  
205 Measures and Resampling Strategies sections. We also assess these binary classification metrics

206 in the validation dataset to ascertain performance on data which has never been used during  
207 model training. To compare performance of the top radiologist observations and Timika Score,  
208 the best pipelines using the top radiologist derived features were compared by bootstrapping  
209 without replacement (N = 200) to the best pipelines using Timika Score alone, or a featureless  
210 pipeline as a control to indicate the density of observed model performance particular to this  
211 dataset that may be due to random chance.

## 212 **Calculation of inferential statistics**

213 To estimate the univariate Odds Ratios (OR) and multivariate adjusted Odds Ratios  
214 (AOR), the finalfit R package was used. Both\_hugenodule1 feature was removed from the  
215 analysis as it did not show any variance. As Timika Score is highly correlated with other  
216 variables in the dataset (e.g. overall abnormal volume and cavity), MRMR feature selection  
217 ([https://mlr3filters.mlr-org.com/reference/mlr\\_filters\\_mrmr.html](https://mlr3filters.mlr-org.com/reference/mlr_filters_mrmr.html)) was performed for the top 5  
218 features to include in the multivariate modeling. As both\_hugenodule1 feature was excluded, less  
219 than 5 features were selected in the multivariate modeling. The both\_lungs feature was included  
220 in the multivariate model to adjust for indication of involvement of both lungs from sextant level  
221 features when assessing estimated odds of sputum positivity.

## 222 **Visualization of Timika Score with other case attributes**

223 Interesting case variables were examined for association with Timika Score to assess  
224 consistency with current understanding of TB clinical risk factors. This included demographic  
225 information such as age and BMI as well as case resistance status, case definition, and treatment  
226 outcome. The initial CXR with available radiologist observations were selected for each case,

227 Timika Score calculated and plotted using ggplot2 to visualize associations with other case  
228 attributes.

229 For calculating temporal changes in Timika Score, those cases with an initial CXR  
230 identified above were filtered for cases with an additional follow up CXR with radiologist  
231 observation. The log<sub>2</sub> transformed relative change were calculated for each image's Timika  
232 Score comparing the earliest score with all subsequent scores. To account for differences in the  
233 length of time between images that may impact the relative score change, the difference in  
234 number of days between CXRs was calculated and the log<sub>2</sub> transformed relative changes were  
235 divided by the number of days between pairs of images for each case to generate the log<sub>2</sub>  
236 relative change by day.

## 237 **Data availability and code**

238 The TB portals program necessitates all users of the data sign a DUA before access to the  
239 underlying, de-identified clinical data is provided and the data can be requested at the following  
240 URL (<https://tbportals.niaid.nih.gov/download-data>). Therefore, this study provides the code to  
241 reproduce the analysis without the underlying raw data  
242 (<https://github.com/niatd/tbportals.xray.sputum.2021>) in compliance with the DUA. To rerun the  
243 analysis, interested parties can request data access by completing the DUA and then place the  
244 downloaded files to the subdirectory of the data folder as provided in the GitHub repo  
245 instructions. To aid reproducibility, the list of patient IDs and condition IDs used from the  
246 sputum prediction analysis are provided in Supplementary Table 4. The specific record  
247 identifiers for the set of images used for visualization of Timika Score in comparison with other  
248 case attributes are provided in Supplementary Table 5. For cases where change in Timika was  
249 calculated over time, the first and last images used in the case are shown along with the dates of

250 the image. Both supplementary tables allow those interested in examining the specific records to  
251 do so after completion of required DUA irrespective of the evolution in number of available  
252 cases in the database.

## 253 **Results**

### 254 **Timika score associates with case clinical characteristics, disease** 255 **severity, and risk**

256 The TB portals resource contains case information bridging across domains of interest  
257 such as clinical, demographic, radiologic, and pathogen genomics. We leveraged the unique  
258 value of these connections to assess any scores or other features of interest from the derived  
259 radiological data. After generating the Timika Scores from all available CXRs with associated  
260 radiologist annotations, we explored the relationship between Timika Score with the additional  
261 information contained about the case mentioned above. We analyzed these relationships to  
262 determine if they are consistent with prior TB clinical findings to assess the plausibility of the  
263 derived radiological data.

### 264 **Age, BMI, Type of Resistance, Case Definition, and Case Outcome show** 265 **associations with Timika Scores**

266 We used only the initial image with associated radiologist observations for the  
267 visualizations assessing Timika Score in relation to other aspects of the case. We visualize  
268 Timika Score with age of onset, BMI, resistance type, case definition, and case outcome and  
269 include a trendline in the relationships for any numerical features. We identify relationships

270 between Timika score and case characteristics of interest that are consistent with our prior  
271 knowledge of TB clinical risk.

272 For instance, Timika Score of the initial image gradually increases with age of onset until  
273 the relationship plateaus around age 50 and decreases although some of the decrease and initial  
274 increase can likely be attributed to the lower density of observations at the two extremes of age  
275 (Fig 1A). Timika Score decreases with increasing BMI until it plateaus around a BMI of ~25  
276 (Fig 1B). Like age, the extremes of the BMI visualization need to be interpreted cautiously  
277 given the lower densities. XDR cases, resistant to the most TB drugs and with the worst  
278 outcomes, are observed to have a higher median Timika Score and interquartile range compared  
279 to other case resistance types (Fig 1C). New cases of TB are shown to have a lower median  
280 Timika Score and interquartile range compared to other types of cases such as Chronic TB, Prior  
281 treatment failure, Relapse, Prior lost to follow up, or Other prior unknown status case definitions  
282 (Fig 1D). Similarly, visualizing case outcomes reveals that detrimental treatment outcomes such  
283 as Died, Treatment failure, Lost to follow up, or Unknown show higher median Timika Scores  
284 compared to beneficial outcomes such as Treatment completion, Cured, or Still on treatment (Fig  
285 1E). Taken together, the results demonstrate associations between Timika Score from initial  
286 available image and case characteristics that reflects TB clinical risk.

287 **Fig 1 Association of Timika Score from initial CXR with radiologist observations with**  
288 **other case attributes.** Timika Score derived from initial available CXRs associated with cases  
289 in the TB Portals repository are visualized along with a variety of salient case characteristics  
290 with missing observations dropped according to variable (N = 1757). For A) and B), the age of  
291 onset (N = 1757) and BMI (N = 1268) from the case are shown with blue trend line respectively.  
292 For C), D), and E), boxplots with interquartile range showing Timika Score by the type of drug  
293 resistance, status of case at start, and status of case at end are shown. In C), MDR non XDR (N =  
294 752), Mono DR (N = 118), Poly DR (N = 78), Sensitive (N = 514), and XDR (N = 295) case  
295 drug resistance statuses are shown with the associated Timika Score from initial CXR with the  
296 case. XDR cases tend to show relatively higher Timika Scores. In D), Chronic TB (N = 18),  
297 Failure (N = 179), Lost to follow up (N = 65), New (N = 1141), Other (N = 45), Relapse (N =  
298 304), and Unknown (N = 5) case definitions are shown with the associated Timika Score from

299 initial CXR with the case. Undesirable case definitions such as Failure, Lost to follow up,  
300 Relapse, Chronic TB, or Unknown from prior history show higher Timika Score compared to  
301 New cases. In E), Completed (N = 170), Cured (N = 984), Died (N = 126), Failure (N = 128),  
302 Lost to follow up (N = 151), Still on treatment (N = 169), and Unknown (N = 29) case outcomes  
303 are shown with the associated Timika Score from initial CXR with the case. Undesirable  
304 outcomes such as Died, Failure, Lost to follow up, or Unknown show higher Timika Score  
305 compared to beneficial outcomes such as Completed, Cured, or Still on treatment.

## 306 **Age, BMI, Type of Resistance, Case Definition, and Case Outcome show** 307 **associations with the temporal changes in Timika Scores**

308         Of those cases with initial CXR images visualized above, we next examined changes in  
309 Timika Score whenever follow up CXR images were available. To do so, we filter on cases with  
310 this additional imaging information. We calculate log<sub>2</sub> transformed Timika Score from initial  
311 image to last available image per case dividing by the number of days between images to account  
312 for the relative amount of time between each image. We use ggplot2 to visualize log<sub>2</sub>  
313 transformed change in Timika Score by day with age of onset, BMI, resistance type, case  
314 definition, and case outcome and include a trend line in the associations for any numerical  
315 features. Interestingly, most cases have a negative relative change in Timika Score by day  
316 indicating improvement in lung status over the course of the case. Such a decrease over time  
317 would be expected given these cases would have been undergoing clinical management. We  
318 observed associations between the relative change by day and case characteristics of interest that  
319 are consistent with prior knowledge of TB clinical risk.

320         For instance, the log<sub>2</sub> transformed change in Timika Score by day steadily decreases with  
321 age of onset such that younger age shows greater relative change whereas older age shows less  
322 relative change (Fig 2A). Conversely, log<sub>2</sub> transformed change in Timika Score by day  
323 increases as BMI increases (Fig 2B). Lower BMI demonstrates a smaller relative change as  
324 compared to higher BMI. When examining relative change by resistance type of the case, Drug

325 sensitive cases are observed to have a larger relative change compared to drug resistant types  
326 (Fig 2C). Similarly, new cases of TB show greater relative change compared to other types of  
327 cases such as Prior treatment failure, Prior lost to follow up, Relapse, or Other prior status at the  
328 start of the case (Fig 2D). Visualizing by case outcomes demonstrates that undesirable outcomes  
329 such as Died, Treatment failure, or Lost to follow up show decreased relative change by day  
330 compared to beneficial outcomes such as Treatment completion or Cured (Fig 2E). Like earlier  
331 visualizations of the Timika Score from available initial image, observations of relative changes  
332 are consistent our prior understanding of TB clinical risk factors.

333 **Fig 2 Association of relative change in Timika Score by day from initial CXR with**  
334 **radiologist observations to last available CXR with radiologist observations with other case**  
335 **attributes.** Log<sub>2</sub> relative change in Timika Score by day from initial available CXR to last  
336 available CXR associated with cases in the TB Portals repository are visualized along with a  
337 variety of salient case characteristics with missing observations dropped according to variable (N  
338 = 297). For A) and B), the age of onset (N = 297) and BMI (N = 292) from the case are  
339 visualized with log<sub>2</sub> relative change in Timika Score by day with blue trend line respectively.  
340 To aid in visualizing the trendline, the y axis was limited to between -0.1 and 0.1 resulting in an  
341 additional 9 outliers being removed for age of onset and BMI case numbers above respectively.  
342 For C), D), and E), boxplots with interquartile range showing log<sub>2</sub> relative change in Timika  
343 Score by day compared by the type of drug resistance, status of case at start, and status of case at  
344 end are shown. In C), MDR non XDR (N = 160), Mono DR (N = 13), Poly DR (N = 1),  
345 Sensitive (N = 24), and XDR (N = 99) case drug resistance statuses are shown with the log<sub>2</sub>  
346 relative change in Timika Score by day from initial CXR to last available CXR. To aid in  
347 visualization, y axis was limited to -0.1, and 0.1 resulting in additional 5, 2, 0, 2, and 0 outliers  
348 being removed from MDR non XDR, Mono DR, Poly DR, Sensitive, and XDR case numbers  
349 above respectively. In general, drug resistant cases show lower relative change in Timika Score  
350 although several groups show low N and must be interpreted cautiously. In D), Failure (N = 35),  
351 Lost to follow up (N = 8), New (N = 184), Other (N = 4), and Relapse (N = 66) case definitions  
352 are shown with the log<sub>2</sub> relative change in Timika Score by day from initial CXR to last  
353 available CXR. To aid in visualization, y axis was limited to -0.1, and 0.1 resulting in additional  
354 0, 0, 8, 1, and 0 outliers being removed from Failure, Lost to follow up, New, Other, and Relapse  
355 case numbers above respectively. Deleterious case definitions such as Failure, Lost to follow up,  
356 Relapse, or Other from prior history show less change in relative Timika Score compared to New  
357 cases. In E), Completed (N = 27), Cured (N = 223), Died (N = 15), Failure (N = 10), Lost to  
358 follow up (N = 20), Still on treatment (N = 1), and Unknown (N = 1) case outcomes are shown  
359 with the log<sub>2</sub> relative change in Timika Score from initial CXR to last available CXR. To aid in  
360 visualization, y axis was limited to -0.1, and 0.1 resulting in additional 4, 5, 0, 0, 0 and 0 outliers  
361 being removed from Completed, Cured, Died, Failure, Lost to follow up, Still on treatment, and  
362 Unknown case numbers above respectively. Deleterious outcomes such as Died, Failure, Lost to



363 follow up, or Unknown show smaller relative changes compared to beneficial outcomes such as  
364 Completed and Cured. As above for other visualizations, caution is warranted given the small  
365 N's associated with certain subgroups.  
366

### 367 **Sputum smear microscopy results associate with Timika score in this cohort** 368 **of TB portals cases**

369 We next assessed the previously reported role of Timika Score for predicting sputum  
370 smear status by analyzing the selected cohort of new cases having microscopy results from  
371 sputum specimens taken prior to treatment with associated images within two weeks of the  
372 specimen (N = 572). Mean Timika Score is lowest amongst new cases with a sputum microscopy  
373 result of negative and increases for microscopy results indicating a higher burden of bacteria  
374 within sputum [1 to 9 in 100, 1+, 2+, etc.] (Fig 3). Only the 4+ level shows slightly lower mean  
375 Timika Score compared to the next highest level of 3+, which may be due to variance from the  
376 lower number of available cases in this 4+ level (N = 22). This clear trend in the TB portals  
377 dataset is consistent with previously reported role of Timika Score for predicting baseline  
378 sputum status.

379 **Fig 3 Timika score derived from radiologist observations of CXR within two weeks of**  
380 **specimen taken prior to treatment start.** Timika score is visualized by the smear microscopy  
381 results of specimens taken prior to treatment start for which CXRs were available within two  
382 weeks of specimen date (N = 572). Boxplots show median Timika Score for associated images  
383 with interquartile range. Images associated with negative smear microscopy status have lower  
384 Timika Scores while those with positive statuses (1 to 9 in 100, 1+, and higher) show  
385 progressively higher Timika Scores that appear to plateau around 2+ or higher. The following  
386 number of Timika Scores derived from radiologist observations of images are available for  
387 Negative, 1 to 9 in 100 (1–9/100), 10 to 99 in 100 (1+), 1 to 9 in 1 (2+), 10 to 99 in 1 (3+), and  
388 More than 99 in 1 (4+) groups respectively: 259, 29, 144, 60, 58, 22.  
389



## 390 **Inferential statistics associated with sputum microscopy status**

391           Given the association of Timika Score with sputum smear microscopy, we continued our  
392 investigation by assessing the risk of a positive sputum microscopy status (1 to 9 in 100, 1+, or  
393 higher) compared to a negative status using Timika score along with the other derived features  
394 from radiologist observations. To do so, we performed univariate and multivariate logistic  
395 regression removing any feature with no variance that caused univariate or multivariate modeling  
396 to fail. We leveraged MRMR feature selection to select the top 5 features for multivariate  
397 models. Timika Score is derived from the radiological features (e.g., presence of cavity and  
398 overall abnormal volume) so we wanted to select additional features that would not directly  
399 correlate with Timika Score but still potentially correlate with sputum microscopy status.

400           We observe multiple features with evidence of involvement of both lungs showing higher  
401 risk of sputum microscopy positivity including calcified nodules, fibrotic nodules, low density  
402 nodules, involvement of both lungs by indication of any type of sextant feature, medium density  
403 nodules, medium cavities, small cavities, multiple cavities, and small nodules (Table 1). For  
404 numeric variables, large cavities, low density nodules, medium cavities, small cavities, and  
405 overall percent of abnormal volume showed statistically significant increases in risk of positive  
406 sputum result (active pathogen detected in the sputum) per each unit increase in percentage  
407 whereas pleural effusion percent of hemithorax involved showed the opposite. Each unit  
408 increase in Timika Score showed an increased risk in pre-treatment sputum positive microscopy  
409 status consistent with its prior reported role. In the multivariate model, the Timika Score showed  
410 a higher risk of positive sputum microscopy status after adjusting for indication of involvement  
411 of both lungs. This suggests that risk of positive sputum microscopy status does not require  
412 evidence of both lung involvement but rather greater percentage abnormal regions or cavity area

413 may be sufficient for the increased risk indicated by Timika Score. Interestingly, the other  
 414 MRMR selected features of the multivariate model were all indicators of involvement of both  
 415 lungs for the respective features. Only the indication of calcified nodules in both lungs  
 416 demonstrated a statistically significant increase in risk of positive sputum microscopy status  
 417 adjusting for other covariates in the multivariate model. This feature could suggest cases with  
 418 unreported prior history of pulmonary TB.

419 **Table 1. Risk of positive sputum status (1+ or higher) by univariate or multivariate logistic**  
 420 **regression analysis on derived features from radiologist observations of CXRs within two**  
 421 **weeks of specimens taken prior to treatment.**  
 422

| Dependent: event2               |     | Negative   | Positive   | OR (univariable)              | OR (multivariable)            |
|---------------------------------|-----|------------|------------|-------------------------------|-------------------------------|
| aremediastinallymphnodespresent | no  | 233 (44.6) | 289 (55.4) | -                             | -                             |
|                                 | yes | 26 (52.0)  | 24 (48.0)  | 0.74 (0.41-1.33, p=0.319)     | -                             |
| both_calcnod                    | no  | 241 (47.2) | 270 (52.8) | -                             | -                             |
|                                 | yes | 18 (29.5)  | 43 (70.5)  | 2.13 (1.22-3.88, p=0.010)     | 2.14 (1.14-4.13, p=0.020)     |
| both_calcsequella1              | no  | 254 (45.9) | 299 (54.1) | -                             | -                             |
|                                 | yes | 5 (26.3)   | 14 (73.7)  | 2.38 (0.90-7.44, p=0.101)     | -                             |
| both_clustnod                   | no  | 229 (44.9) | 281 (55.1) | -                             | -                             |
|                                 | yes | 30 (48.4)  | 32 (51.6)  | 0.87 (0.51-1.48, p=0.603)     | -                             |
| both_collapse1                  | no  | 259 (45.4) | 311 (54.6) | -                             | -                             |
|                                 | yes | 0 (0.0)    | 2 (100.0)  | 1764014.84 (0.00-NA, p=0.982) | 1485353.66 (0.00-NA, p=0.981) |
| both_fibroticnodule1            | no  | 201 (48.4) | 214 (51.6) | -                             | -                             |
|                                 | yes | 58 (36.9)  | 99 (63.1)  | 1.60 (1.10-2.35, p=0.014)     | -                             |
| both_highden1                   | no  | 257 (4     | 304 (5     | -                             | -                             |

|                                                   |     |            |            |                               |                               |
|---------------------------------------------------|-----|------------|------------|-------------------------------|-------------------------------|
|                                                   |     | 5.8)       | 4.2)       |                               |                               |
|                                                   | yes | 2 (18.2)   | 9 (81.8)   | 3.80 (0.97-25.10, p=0.089)    | -                             |
| both_isanylargecavitymult                         | no  | 259 (45.4) | 311 (54.6) | -                             | -                             |
|                                                   | yes | 0 (0.0)    | 2 (100.0)  | 1764014.84 (0.00-NA, p=0.982) | -                             |
| both_largecavity1                                 | no  | 259 (45.4) | 312 (54.6) | -                             | -                             |
|                                                   | yes | 0 (0.0)    | 1 (100.0)  | 646864.01 (0.00-NA, p=0.980)  | 1056464.82 (0.00-NA, p=0.987) |
| both_largenodule1                                 | no  | 257 (45.5) | 308 (54.5) | -                             | -                             |
|                                                   | yes | 2 (28.6)   | 5 (71.4)   | 2.09 (0.45-14.65, p=0.382)    | -                             |
| both_lowden1                                      | no  | 231 (47.4) | 256 (52.6) | -                             | -                             |
|                                                   | yes | 28 (32.9)  | 57 (67.1)  | 1.84 (1.14-3.02, p=0.014)     | -                             |
| both_lowgroundglassdensity<br>activefreshnodules1 | no  | 193 (46.1) | 226 (53.9) | -                             | -                             |
|                                                   | yes | 66 (43.1)  | 87 (56.9)  | 1.13 (0.78-1.64, p=0.534)     | -                             |
| both_lungs                                        | no  | 149 (52.3) | 136 (47.7) | -                             | -                             |
|                                                   | yes | 110 (38.3) | 177 (61.7) | 1.76 (1.27-2.46, p=0.001)     | 0.87 (0.57-1.31, p=0.504)     |
| both_medden1                                      | no  | 231 (46.9) | 262 (53.1) | -                             | -                             |
|                                                   | yes | 28 (35.4)  | 51 (64.6)  | 1.61 (0.99-2.66, p=0.060)     | -                             |
| both_mediumcavity1                                | no  | 258 (45.9) | 304 (54.1) | -                             | -                             |
|                                                   | yes | 1 (10.0)   | 9 (90.0)   | 7.64 (1.42-141.33, p=0.055)   | -                             |
| both_mediumnodule1                                | no  | 229 (45.7) | 272 (54.3) | -                             | -                             |
|                                                   | yes | 30 (42.3)  | 41 (57.7)  | 1.15 (0.70-1.92, p=0.584)     | -                             |
| both_multiplecavitiesbeseen                       | no  | 256 (46.2) | 298 (53.8) | -                             | -                             |
|                                                   | yes | 3 (16.7)   | 15 (83.3)  | 4.30 (1.40-18.69, p=0.022)    | -                             |

|                                                  |              |                |                |                                |   |
|--------------------------------------------------|--------------|----------------|----------------|--------------------------------|---|
| both_multnod                                     | no           | 220 (4<br>6.9) | 249 (5<br>3.1) | -                              | - |
|                                                  | yes          | 39 (37<br>.9)  | 64 (62<br>.1)  | 1.45 (0.94-<br>2.26, p=0.096)  | - |
| both_noncalcnod                                  | no           | 200 (4<br>7.3) | 223 (5<br>2.7) | -                              | - |
|                                                  | yes          | 59 (39<br>.6)  | 90 (60<br>.4)  | 1.37 (0.94-<br>2.01, p=0.106)  | - |
| both_smallcavity1                                | no           | 253 (4<br>6.9) | 287 (5<br>3.1) | -                              | - |
|                                                  | yes          | 6 (18.<br>8)   | 26 (81<br>.2)  | 3.82 (1.65-<br>10.39, p=0.004) | - |
| both_smallnodule1                                | no           | 180 (4<br>8.9) | 188 (5<br>1.1) | -                              | - |
|                                                  | yes          | 79 (38<br>.7)  | 125 (6<br>1.3) | 1.51 (1.07-<br>2.15, p=0.019)  | - |
| ispleuraleffusionbilateral                       | no           | 257 (4<br>5.2) | 312 (5<br>4.8) | -                              | - |
|                                                  | yes          | 2 (66.<br>7)   | 1 (33.<br>3)   | 0.41 (0.02-<br>4.32, p=0.470)  | - |
| mean_calcsequella                                | Mean<br>(SD) | 0.1 (0.<br>3)  | 0.2 (0.<br>8)  | 1.20 (0.90-<br>1.83, p=0.316)  | - |
| mean_collapse                                    | Mean<br>(SD) | 0.3 (3.<br>2)  | 0.3 (2.<br>1)  | 1.00 (0.93-<br>1.07, p=0.938)  | - |
| mean_fibroticnodule                              | Mean<br>(SD) | 2.2 (3.<br>6)  | 2.4 (3.<br>8)  | 1.02 (0.97-<br>1.06, p=0.505)  | - |
| mean_highden                                     | Mean<br>(SD) | 0.2 (0.<br>8)  | 0.5 (3.<br>1)  | 1.08 (0.98-<br>1.27, p=0.225)  | - |
| mean_hugenodule                                  | Mean<br>(SD) | 0.0 (0.<br>2)  | 0.0 (0.<br>2)  | 0.87 (0.35-<br>2.04, p=0.729)  | - |
| mean_largecavity                                 | Mean<br>(SD) | 0.1 (1.<br>2)  | 0.6 (2.<br>6)  | 1.18 (1.05-<br>1.38, p=0.015)  | - |
| mean_largenodule                                 | Mean<br>(SD) | 0.2 (0.<br>6)  | 0.1 (0.<br>8)  | 0.93 (0.71-<br>1.18, p=0.532)  | - |
| mean_lowden                                      | Mean<br>(SD) | 2.7 (4.<br>3)  | 4.6 (6.<br>6)  | 1.07 (1.04-<br>1.11, p<0.001)  | - |
| mean_lowgroundglassdensit<br>yactivefreshnodules | Mean<br>(SD) | 4.7 (8.<br>7)  | 4.6 (7.<br>4)  | 1.00 (0.98-<br>1.02, p=0.948)  | - |
| mean_medden                                      | Mean<br>(SD) | 2.3 (5.<br>4)  | 3.0 (5.<br>9)  | 1.02 (0.99-<br>1.06, p=0.150)  | - |
| mean_mediumcavity                                | Mean<br>(SD) | 0.3 (1.<br>2)  | 1.1 (2.<br>7)  | 1.28 (1.15-<br>1.46, p<0.001)  | - |
| mean_mediumnodule                                | Mean         | 1.9 (4.)       | 1.4 (3.)       | 0.96 (0.92-                    | - |

|                                            |           |             |             |                           |                           |
|--------------------------------------------|-----------|-------------|-------------|---------------------------|---------------------------|
|                                            | (SD)      | 0)          | 2)          | 1.01, p=0.107)            |                           |
| mean_smallcavity                           | Mean (SD) | 0.4 (1.1)   | 1.2 (2.4)   | 1.40 (1.23-1.61, p<0.001) | -                         |
| mean_smallnodule                           | Mean (SD) | 4.9 (8.3)   | 5.7 (8.0)   | 1.01 (0.99-1.03, p=0.265) | -                         |
| othernontbabnormalities                    | no        | 217 (45.5)  | 260 (54.5)  | -                         | -                         |
|                                            | yes       | 42 (44.2)   | 53 (55.8)   | 1.05 (0.68-1.65, p=0.819) | -                         |
| overall_timika                             | Mean (SD) | 30.9 (26.6) | 47.9 (30.2) | 1.02 (1.01-1.03, p<0.001) | 1.02 (1.01-1.03, p<0.001) |
| overallpercentofabnormalvolume             | Mean (SD) | 22.1 (18.2) | 26.6 (18.7) | 1.01 (1.00-1.02, p=0.004) | -                         |
| pleuraleffusionpercentofhemithoraxinvolved | Mean (SD) | 1.9 (7.5)   | 0.8 (4.1)   | 0.96 (0.93-0.99, p=0.029) | -                         |

423

424 Odds ratios and adjusted odds ratios from univariate and multivariate logistic regression analysis  
 425 on derived features from radiologist observations of images taken within two weeks of  
 426 specimens prior to treatment start. Shown are the individual derived features from radiologist  
 427 observations along with the summary statistics across the prediction categories of Negative or  
 428 Positive (1 to 9 in 100, 1+, or higher sputum smear microscopy status). Odds ratios with the 95%  
 429 confidence intervals with unadjusted P-values are shown for each derived feature for the  
 430 univariate and if applicable, multivariate models. The - sign shows reference categories in the  
 431 univariate Odds Ratio column or reference as well as excluded variables in the multivariate Odds  
 432 Ratio column.  
 433

## 434 **Assessing predictive capacity of machine learning models**

435 The TB portals offers a variety of radiologist observations of CXRs that may provide  
 436 additional information towards the prediction of baseline sputum smear microscopy status.  
 437 Therefore, we investigated the additional features comparing predictive performance to Timika  
 438 Score alone. By doing so, we sought to identify any additional features that might improve upon  
 439 Timika Score performance and to evaluate how well Timika Score itself could predict sputum  
 440 status when compared to various feature selection or dimensionality reduction techniques that  
 441 summarize the radiological features within the data.

## 442 **Comparison of predicting 2+ versus 1+ sputum smear status in training and** 443 **validation sets**

444 We noted that sputum smear scores of 2+ or greater showed a higher mean Timika Score  
445 so we tried two predictive approaches: task one involved predicting positive (1 to 9 in 100, 1+, or  
446 greater smear status indicating any active pathogen in the sputum) versus negative smear status  
447 while task two involved predicting higher bacterial load positive (2+, 3+, or greater smear status)  
448 versus negative sputum status. We split the data into a 70% training set and 30% validation set  
449 for the model training and validation. All pipelines were created and run using the MLR3  
450 package which allows for unbiased assessment of model performance by encapsulating the pre-  
451 processing steps within the cross-validation approach. All prediction tasks included featureless  
452 pipelines showing a non-informative model that only predicts the most prevalent class or  
453 randomly selects a class in case of a tie. Thus, the featureless model can be considered a control  
454 and predictive models should perform significantly better than this featureless control model.

455 In the first prediction problem attempting to discriminate positive from negative status, 5-  
456 fold cross validation results on the training data showed that most models demonstrated  
457 relatively similar predictive performance across pipelines (Table 2). Pipelines using top 5  
458 components by principal component analysis (which captured ~ 50% of variability in the dataset)  
459 tended to show slightly decreased performance in general. Since this prediction problem did not  
460 have a large class imbalance, the addition of a class balancing step did not make a significant  
461 impact to prediction performance for the pipelines tested. Of note, pipelines only including the  
462 Timika Score showed equivalent performance in general to workflows using the top 5 predictive  
463 features from various feature selection algorithms. There is a slight decrease in performance of  
464 Timika-only models to the best top 5 feature selection model, which reflect that additional

465 features may provide some minimal improvement over Timika Score. To test predictive  
 466 performance on data which the models had not seen before, we trained the above models on the  
 467 entire training set and tested on 30% of held out validation data (Table 3). We observed similar  
 468 findings to the cross-validated results we obtained from the training data.

469 **Table 2. Comparison of machine learning pipeline performance via 5-fold cross-validation**  
 470 **for predicting positive (1 to 9 in 100, 1+, or higher) versus negative sputum microscopy**  
 471 **status on training data.**

| pipeline                                                 | classif.au<br>c  | classif.mc<br>c  | classif.sensit<br>ivity | classif.specif<br>icity |
|----------------------------------------------------------|------------------|------------------|-------------------------|-------------------------|
| ffact.cb.enc.zv.num_scale.flt.auc.classif.m<br>ultinom   | 0.69 +/-<br>0.02 | 0.37 +/-<br>0.02 | 0.73 +/- 0.05           | 0.63 +/- 0.05           |
| ffact.cb.enc.zv.num_scale.flt.auc.classif.lo<br>g_reg    | 0.7 +/-<br>0.02  | 0.34 +/-<br>0.05 | 0.78 +/- 0.03           | 0.61 +/- 0.03           |
| ffact.cb.enc.zv.num_scale.flt.njmim.classi<br>f.ranger   | 0.69 +/-<br>0.03 | 0.33 +/-<br>0.03 | 0.69 +/- 0.04           | 0.66 +/- 0.09           |
| timika.num_scale.classif.rpart                           | 0.7 +/-<br>0.01  | 0.32 +/-<br>0.05 | 0.51 +/- 0.23           | 0.75 +/- 0.08           |
| timika.num_scale.cb.classif.rpart                        | 0.67 +/-<br>0.04 | 0.32 +/-<br>0.03 | 0.62 +/- 0.07           | 0.65 +/- 0.08           |
| ffact.cb.enc.zv.num_scale.flt.auc.classif.c<br>v_glmnet  | 0.68 +/-<br>0.03 | 0.32 +/-<br>0.02 | 0.72 +/- 0.08           | 0.6 +/- 0.05            |
| ffact.cb.enc.zv.num_scale.flt.auc.classif.gl<br>mnet     | 0.69 +/-<br>0.01 | 0.31 +/-<br>0.06 | 0.78 +/- 0.04           | 0.61 +/- 0.02           |
| ffact.cb.enc.zv.num_scale.flt.auc.classif.n<br>net       | 0.66 +/-<br>0.06 | 0.31 +/-<br>0.04 | 0.78 +/- 0.01           | 0.57 +/- 0.05           |
| ffact.enc.zv.num_scale.flt.njmim.classif.lo<br>g_reg     | 0.7 +/-<br>0.01  | 0.31 +/-<br>0.04 | 0.75 +/- 0              | 0.6 +/- 0.08            |
| ffact.enc.zv.num_scale.flt.njmim.classif.m<br>ultinom    | 0.7 +/-<br>0.01  | 0.31 +/-<br>0.04 | 0.75 +/- 0              | 0.6 +/- 0.08            |
| ffact.enc.zv.num_scale.flt.njmim.classif.ra<br>nger      | 0.68 +/-<br>0.04 | 0.31 +/-<br>0.02 | 0.53 +/- 0.12           | 0.74 +/- 0.04           |
| ffact.cb.enc.zv.num_scale.flt.njmim.classi<br>f.svm      | 0.68 +/-<br>0.01 | 0.31 +/- 0       | 0.68 +/- 0.05           | 0.63 +/- 0.05           |
| ffact.cb.enc.zv.num_scale.flt.auc.classif.sv<br>m        | 0.66 +/-<br>0.01 | 0.3 +/-<br>0.04  | 0.73 +/- 0.05           | 0.51 +/- 0.08           |
| ffact.cb.enc.zv.num_scale.flt.mrmr.classif.<br>cv_glmnet | 0.67 +/-<br>0.02 | 0.3 +/-<br>0.04  | 0.69 +/- 0.08           | 0.6 +/- 0.05            |
| ffact.cb.enc.zv.num_scale.flt.njmim.classi<br>f.log_reg  | 0.65 +/-<br>0.03 | 0.3 +/-<br>0.04  | 0.76 +/- 0.07           | 0.56 +/- 0.02           |
| ffact.cb.enc.zv.num_scale.flt.njmim.classi               | 0.69 +/-         | 0.3 +/-          | 0.81 +/- 0.01           | 0.42 +/- 0.07           |

|                                              |          |          |               |               |
|----------------------------------------------|----------|----------|---------------|---------------|
| f.naive_bayes                                | 0.05     | 0.04     |               |               |
| ffact.cb.enc.zv.num_scale.flt.njmim.classi   | 0.69 +/- | 0.3 +/-  | 0.75 +/- 0.04 | 0.55 +/- 0.05 |
| f.multinom                                   | 0.02     | 0.03     |               |               |
| timika.num_scale.cb.classif.log_reg          | 0.67 +/- | 0.29 +/- | 0.69 +/- 0.11 | 0.6 +/- 0.05  |
|                                              | 0.02     | 0.03     |               |               |
| timika.num_scale.cb.classif.multinom         | 0.67 +/- | 0.29 +/- | 0.69 +/- 0.11 | 0.6 +/- 0.05  |
|                                              | 0.02     | 0.03     |               |               |
| timika.num_scale.classif.naive_bayes         | 0.67 +/- | 0.29 +/- | 0.69 +/- 0.12 | 0.6 +/- 0.08  |
|                                              | 0.02     | 0.03     |               |               |
| ffact.cb.enc.zv.num_scale.pca.classif.nnet   | 0.62 +/- | 0.28 +/- | 0.58 +/- 0.08 | 0.77 +/- 0.11 |
|                                              | 0.09     | 0.09     |               |               |
| ffact.cb.enc.zv.num_scale.flt.auc.classif.n  | 0.71 +/- | 0.28 +/- | 0.83 +/- 0.08 | 0.39 +/- 0.06 |
| aive_bayes                                   | 0.04     | 0.06     |               |               |
| ffact.cb.enc.zv.num_scale.flt.auc.classif.r  | 0.64 +/- | 0.28 +/- | 0.68 +/- 0.19 | 0.6 +/- 0.21  |
| part                                         | 0.06     | 0.04     |               |               |
| ffact.enc.zv.num_scale.flt.njmim.classif.sv  | 0.66 +/- | 0.27 +/- | 0.56 +/- 0.02 | 0.68 +/- 0.05 |
| m                                            | 0.01     | 0.09     |               |               |
| ffact.cb.enc.zv.num_scale.pca.classif.svm    | 0.67 +/- | 0.27 +/- | 0.59 +/- 0.02 | 0.6 +/- 0.17  |
|                                              | 0.03     | 0.08     |               |               |
| timika.num_scale.classif.kknn                | 0.64 +/- | 0.27 +/- | 0.75 +/- 0.08 | 0.5 +/- 0.02  |
|                                              | 0.03     | 0.08     |               |               |
| ffact.cb.enc.zv.num_scale.pca.classif.mul    | 0.71 +/- | 0.27 +/- | 0.76 +/- 0.07 | 0.49 +/- 0    |
| tinom                                        | 0.02     | 0.05     |               |               |
| timika.num_scale.classif.log_reg             | 0.67 +/- | 0.27 +/- | 0.56 +/- 0.08 | 0.66 +/- 0.03 |
|                                              | 0.02     | 0.05     |               |               |
| timika.num_scale.classif.multinom            | 0.67 +/- | 0.27 +/- | 0.56 +/- 0.08 | 0.66 +/- 0.03 |
|                                              | 0.02     | 0.05     |               |               |
| ffact.cb.enc.zv.num_scale.flt.mrmr.classif.  | 0.66 +/- | 0.27 +/- | 0.68 +/- 0.05 | 0.58 +/- 0.07 |
| xgboost                                      | 0.03     | 0.03     |               |               |
| ffact.cb.enc.zv.num_scale.flt.mrmr.classif.  | 0.66 +/- | 0.27 +/- | 0.72 +/- 0.08 | 0.55 +/- 0.08 |
| ranger                                       | 0.01     | 0.02     |               |               |
| timika.num_scale.cb.classif.naive_bayes      | 0.67 +/- | 0.27 +/- | 0.72 +/- 0.04 | 0.56 +/- 0.03 |
|                                              | 0.02     | 0.02     |               |               |
| timika.num_scale.classif.xgboost             | 0.66 +/- | 0.27 +/- | 0.61 +/- 0.08 | 0.63 +/- 0.02 |
|                                              | 0.04     | 0.01     |               |               |
| ffact.cb.enc.zv.num_scale.flt.auc.classif.ra | 0.61 +/- | 0.26 +/- | 0.61 +/- 0.08 | 0.63 +/- 0.03 |
| nger                                         | 0.02     | 0.17     |               |               |
| ffact.cb.enc.zv.num_scale.flt.mrmr.classif.  | 0.65 +/- | 0.26 +/- | 0.69 +/- 0.08 | 0.6 +/- 0.1   |
| svm                                          | 0.02     | 0.07     |               |               |
| timika.num_scale.classif.svm                 | 0.65 +/- | 0.26 +/- | 0.61 +/- 0.12 | 0.65 +/- 0.07 |
|                                              | 0.03     | 0.07     |               |               |
| ffact.cb.enc.zv.num_scale.flt.mrmr.classif.  | 0.66 +/- | 0.26 +/- | 0.69 +/- 0.04 | 0.6 +/- 0.1   |
| multinom                                     | 0.03     | 0.06     |               |               |



|                                                       |               |               |               |               |
|-------------------------------------------------------|---------------|---------------|---------------|---------------|
| ffact.enc.zv.num_scale.flt.njmim.classif.glmnet       | 0.7 +/- 0.01  | 0.26 +/- 0.05 | 0.61 +/- 0.08 | 0.65 +/- 0.12 |
| ffact.cb.enc.zv.num_scale.flt.mrmr.classif.rpart      | 0.61 +/- 0.04 | 0.26 +/- 0.04 | 0.67 +/- 0.12 | 0.6 +/- 0.07  |
| timika.num_scale.classif.nnet                         | 0.66 +/- 0.02 | 0.26 +/- 0.04 | 0.69 +/- 0.08 | 0.56 +/- 0.01 |
| ffact.cb.enc.zv.num_scale.flt.mrmr.classif.glmnet     | 0.64 +/- 0.01 | 0.26 +/- 0.03 | 0.69 +/- 0.08 | 0.6 +/- 0.05  |
| ffact.cb.enc.zv.num_scale.flt.njmim.classif.cv_glmnet | 0.68 +/- 0.03 | 0.26 +/- 0.03 | 0.69 +/- 0.11 | 0.6 +/- 0.05  |
| timika.num_scale.cb.classif.nnet                      | 0.67 +/- 0.01 | 0.26 +/- 0.03 | 0.72 +/- 0.04 | 0.56 +/- 0.07 |
| timika.num_scale.cb.classif.svm                       | 0.68 +/- 0.01 | 0.26 +/- 0.03 | 0.69 +/- 0.08 | 0.6 +/- 0.05  |
| ffact.enc.zv.num_scale.flt.njmim.classif.naive_bayes  | 0.69 +/- 0.01 | 0.25 +/- 0.1  | 0.78 +/- 0.13 | 0.55 +/- 0.2  |
| ffact.cb.enc.zv.num_scale.flt.njmim.classif.nnet      | 0.65 +/- 0.04 | 0.25 +/- 0.09 | 0.65 +/- 0.06 | 0.53 +/- 0.09 |
| ffact.cb.enc.zv.num_scale.pca.classif.log_reg         | 0.69 +/- 0.08 | 0.24 +/- 0.06 | 0.75 +/- 0.08 | 0.48 +/- 0.02 |
| ffact.cb.enc.zv.num_scale.flt.mrmr.classif.nnet       | 0.65 +/- 0.02 | 0.24 +/- 0.05 | 0.69 +/- 0.08 | 0.51 +/- 0.03 |
| ffact.enc.zv.num_scale.flt.njmim.classif.cv_glmnet    | 0.68 +/- 0.03 | 0.24 +/- 0.04 | 0.56 +/- 0.04 | 0.68 +/- 0.2  |
| ffact.cb.enc.zv.num_scale.flt.mrmr.classif.log_reg    | 0.65 +/- 0.01 | 0.24 +/- 0.02 | 0.69 +/- 0.08 | 0.6 +/- 0.05  |
| ffact.cb.enc.zv.num_scale.pca.classif.kknn            | 0.65 +/- 0.03 | 0.24 +/- 0.02 | 0.61 +/- 0.04 | 0.63 +/- 0.03 |
| ffact.cb.enc.zv.num_scale.flt.njmim.classif.kknn      | 0.64 +/- 0.05 | 0.23 +/- 0.08 | 0.64 +/- 0.16 | 0.53 +/- 0.12 |
| ffact.cb.enc.zv.num_scale.flt.njmim.classif.glmnet    | 0.66 +/- 0.02 | 0.23 +/- 0.02 | 0.64 +/- 0.08 | 0.58 +/- 0.08 |
| ffact.enc.zv.num_scale.flt.njmim.classif.rpart        | 0.65 +/- 0.06 | 0.22 +/- 0.13 | 0.44 +/- 0.08 | 0.73 +/- 0.06 |
| ffact.enc.zv.num_scale.flt.njmim.classif.kknn         | 0.64 +/- 0.06 | 0.22 +/- 0.11 | 0.67 +/- 0.04 | 0.58 +/- 0.05 |
| ffact.cb.enc.zv.num_scale.pca.classif.ranger          | 0.62 +/- 0.05 | 0.22 +/- 0.1  | 0.56 +/- 0.12 | 0.63 +/- 0.08 |
| timika.num_scale.cb.classif.kknn                      | 0.63 +/- 0.03 | 0.21 +/- 0.04 | 0.73 +/- 0.01 | 0.44 +/- 0.07 |
| ffact.cb.enc.zv.num_scale.flt.njmim.classif.xgboost   | 0.67 +/- 0.05 | 0.2 +/- 0.19  | 0.67 +/- 0.09 | 0.56 +/- 0.12 |
| ffact.cb.enc.zv.num_scale.pca.classif.glm             | 0.7 +/- 0.01  | 0.2 +/- 0.01  | 0.75 +/- 0.04 | 0.49 +/- 0.02 |

|                                                         |               |                |               |               |
|---------------------------------------------------------|---------------|----------------|---------------|---------------|
| net                                                     | 0.08          | 0.11           |               |               |
| timika.num_scale.classif.ranger                         | 0.64 +/- 0.06 | 0.2 +/- 0.11   | 0.59 +/- 0.11 | 0.63 +/- 0.05 |
| timika.num_scale.cb.classif.ranger                      | 0.6 +/- 0.09  | 0.19 +/- 0.13  | 0.65 +/- 0.07 | 0.55 +/- 0.03 |
| ffact.cb.enc.zv.num_scale.flt.auc.classif.xgboost       | 0.6 +/- 0.01  | 0.19 +/- 0.03  | 0.7 +/- 0.03  | 0.51 +/- 0.07 |
| ffact.enc.zv.num_scale.flt.njmim.classif.xgboost        | 0.61 +/- 0.05 | 0.18 +/- 0.05  | 0.57 +/- 0.14 | 0.63 +/- 0.05 |
| timika.num_scale.cb.classif.xgboost                     | 0.62 +/- 0.06 | 0.17 +/- 0.12  | 0.57 +/- 0.06 | 0.53 +/- 0.02 |
| ffact.cb.enc.zv.num_scale.flt.njmim.classif.rpart       | 0.63 +/- 0.03 | 0.16 +/- 0.14  | 0.53 +/- 0.12 | 0.63 +/- 0.14 |
| ffact.cb.enc.zv.num_scale.flt.mrmr.classif.kknn         | 0.58 +/- 0.02 | 0.16 +/- 0.03  | 0.75 +/- 0.08 | 0.37 +/- 0.1  |
| ffact.enc.zv.num_scale.flt.njmim.classif.net            | 0.66 +/- 0.07 | 0.15 +/- 0.11  | 0.49 +/- 0.1  | 0.7 +/- 0.02  |
| ffact.cb.enc.zv.num_scale.pca.classif.xgboost           | 0.62 +/- 0.04 | 0.13 +/- 0.16  | 0.53 +/- 0.04 | 0.58 +/- 0.02 |
| ffact.cb.enc.zv.num_scale.flt.auc.classif.kknn          | 0.61 +/- 0.07 | 0.12 +/- 0.08  | 0.58 +/- 0.04 | 0.51 +/- 0.03 |
| ffact.cb.enc.zv.num_scale.pca.classif.rpart             | 0.57 +/- 0    | 0.12 +/- 0.08  | 0.53 +/- 0.04 | 0.58 +/- 0.03 |
| ffact.cb.enc.zv.num_scale.pca.classif.naive_bayes       | 0.55 +/- 0.06 | 0.1 +/- 0.18   | 0.86 +/- 0.04 | 0.23 +/- 0.06 |
| ffact.cb.enc.zv.num_scale.flt.mrmr.classif.naive_bayes  | 0.65 +/- 0.01 | 0.1 +/- 0.15   | 1 +/- 0       | 0.02 +/- 0.03 |
| ffact.cb.enc.zv.num_scale.pca.classif.cv_glmnet         | 0.59 +/- 0.13 | 0.09 +/- 0.17  | 0.64 +/- 0.16 | 0.41 +/- 0.05 |
| ffact.cb.enc.zv.num_scale.pca.classif.featureless       | 0.5 +/- 0     | 0.09 +/- 0.02  | 0.57 +/- 0.02 | 0.52 +/- 0.05 |
| ffact.cb.enc.zv.num_scale.flt.mrmr.classif.featureless  | 0.5 +/- 0     | 0.05 +/- 0.09  | 0.56 +/- 0.1  | 0.53 +/- 0.05 |
| ffact.cb.enc.zv.num_scale.flt.njmim.classif.featureless | 0.5 +/- 0     | 0.03 +/- 0.09  | 0.53 +/- 0.08 | 0.56 +/- 0.1  |
| ffact.enc.zv.num_scale.flt.njmim.classif.featureless    | 0.5 +/- 0     | 0 +/- 0        | 0 +/- 0       | 1 +/- 0       |
| timika.num_scale.classif.featureless                    | 0.5 +/- 0     | 0 +/- 0        | 0 +/- 0       | 1 +/- 0       |
| timika.num_scale.cb.classif.featureless                 | 0.5 +/- 0     | -0.12 +/- 0.04 | 0.36 +/- 0.12 | 0.52 +/- 0.09 |
| ffact.cb.enc.zv.num_scale.flt.auc.classif.featureless   | 0.5 +/- 0     | -0.02 +/- 0.03 | 0.43 +/- 0.06 | 0.45 +/- 0.05 |

473 The machine learning pipeline is shown in the pipeline column. Model performance metrics  
 474 include Area under the curve (classif.auc), Balanced accuracy (classif.bacc), Matthew's  
 475 Correlation Coefficient (classif.mcc), Sensitivity (classif.sensitivity), and Specificity  
 476 (classif.specifcity). Each cell represents the median metric +/- the MAD for the 5-fold cross  
 477 validation testing on the training data representing 70% of the entire dataset. Pipelines using only  
 478 the Timika Score for prediction start with Timika in the pipeline name. Each pipeline shows all  
 479 steps used in the pipeline ending with the machine learning algorithm used and are ordered by  
 480 classif.mcc.  
 481

482 **Table 3. Comparison of machine learning pipeline performance for predicting positive (1 to**  
 483 **9 in 100, 1+, or higher) versus negative sputum microscopy status on validation data.**  
 484

| pipeline                                             | classif.auc   | classif.mcc     | classif.sensitivity | classif.specifcity |
|------------------------------------------------------|---------------|-----------------|---------------------|--------------------|
| timika.num_scale.classif.rpart                       | 0.66905<br>26 | 0.3686316<br>25 | 0.65333333          | 0.71578947         |
| timika.num_scale.cb.classif.rpart                    | 0.66905<br>26 | 0.3686316<br>25 | 0.65333333          | 0.71578947         |
| ffact.cb.enc.zv.num_scale.flt.mrmr.classif.log_reg   | 0.66533<br>33 | 0.3426355<br>61 | 0.73333333          | 0.61052632         |
| ffact.cb.enc.zv.num_scale.flt.njmim.classif.multinom | 0.67747<br>37 | 0.3300229<br>46 | 0.76                | 0.56842105         |
| timika.num_scale.classif.naive_bayes                 | 0.65649<br>12 | 0.3290517<br>73 | 0.72                | 0.61052632         |
| timika.num_scale.cb.classif.log_reg                  | 0.65649<br>12 | 0.3290517<br>73 | 0.72                | 0.61052632         |
| timika.num_scale.cb.classif.multinom                 | 0.65649<br>12 | 0.3290517<br>73 | 0.72                | 0.61052632         |
| timika.num_scale.cb.classif.svm                      | 0.65494<br>74 | 0.3290517<br>73 | 0.72                | 0.61052632         |
| ffact.cb.enc.zv.num_scale.flt.mrmr.classif.cv_glmnet | 0.65649<br>12 | 0.3290517<br>73 | 0.72                | 0.61052632         |
| ffact.cb.enc.zv.num_scale.flt.mrmr.classif.rpart     | 0.66526<br>32 | 0.3290517<br>73 | 0.72                | 0.61052632         |
| ffact.cb.enc.zv.num_scale.flt.mrmr.classif.svm       | 0.65382<br>46 | 0.3290517<br>73 | 0.72                | 0.61052632         |
| ffact.cb.enc.zv.num_scale.flt.mrmr.classif.ranger    | 0.67389<br>47 | 0.3260949<br>51 | 0.7466667           | 0.57894737         |
| ffact.cb.enc.zv.num_scale.flt.mrmr.classif.multinom  | 0.65080<br>7  | 0.3200582<br>31 | 0.76                | 0.55789474         |
| timika.num_scale.classif.nnet                        | 0.65649<br>12 | 0.3188608<br>49 | 0.72                | 0.6                |
| ffact.cb.enc.zv.num_scale.flt.njmim.classif.lo       | 0.68343       | 0.3188608       | 0.72                | 0.6                |

|                                                           |               |                 |           |            |
|-----------------------------------------------------------|---------------|-----------------|-----------|------------|
| g_reg                                                     | 86            | 49              |           |            |
| ffact.enc.zv.num_scale.flt.njmim.classif.m<br>ultinom     | 0.68343<br>86 | 0.3188608<br>49 | 0.72      | 0.6        |
| ffact.cb.enc.zv.num_scale.flt.mrmr.classif.<br>glmnet     | 0.64807<br>02 | 0.3160651<br>51 | 0.7466667 | 0.56842105 |
| ffact.cb.enc.zv.num_scale.flt.njmim.classif.<br>glmnet    | 0.68414<br>04 | 0.3101006<br>39 | 0.76      | 0.54736842 |
| ffact.cb.enc.zv.num_scale.flt.mrmr.classif.<br>nnet       | 0.65396<br>49 | 0.3101006<br>39 | 0.76      | 0.54736842 |
| ffact.cb.enc.zv.num_scale.flt.auc.classif.lo<br>g_reg     | 0.68315<br>79 | 0.3052985<br>67 | 0.7066667 | 0.6        |
| ffact.cb.enc.zv.num_scale.flt.auc.classif.sv<br>m         | 0.64322<br>81 | 0.3052985<br>67 | 0.7066667 | 0.6        |
| ffact.cb.enc.zv.num_scale.flt.auc.classif.gl<br>mnet      | 0.68526<br>32 | 0.3020841<br>6  | 0.6933333 | 0.61052632 |
| ffact.cb.enc.zv.num_scale.flt.auc.classif.rp<br>art       | 0.69536<br>84 | 0.3020841<br>6  | 0.6933333 | 0.61052632 |
| timika.num_scale.cb.classif.xgboost                       | 0.66764<br>91 | 0.2985495<br>67 | 0.72      | 0.57894737 |
| ffact.cb.enc.zv.num_scale.flt.auc.classif.m<br>ultinom    | 0.68154<br>39 | 0.2950861<br>36 | 0.7066667 | 0.58947368 |
| ffact.enc.zv.num_scale.flt.njmim.classif.nn<br>et         | 0.68336<br>84 | 0.2901905       | 0.56      | 0.72631579 |
| ffact.cb.enc.zv.num_scale.flt.auc.classif.cv<br>glmnet    | 0.67214<br>04 | 0.2884210<br>53 | 0.72      | 0.56842105 |
| ffact.cb.enc.zv.num_scale.flt.njmim.classif.<br>cv_glmnet | 0.66701<br>75 | 0.2884210<br>53 | 0.72      | 0.56842105 |
| ffact.cb.enc.zv.num_scale.flt.njmim.classif.<br>log_reg   | 0.65985<br>96 | 0.2820708<br>94 | 0.7333333 | 0.54736842 |
| ffact.cb.enc.zv.num_scale.flt.njmim.classif.<br>svm       | 0.66940<br>35 | 0.2820708<br>94 | 0.7333333 | 0.54736842 |
| ffact.cb.enc.zv.num_scale.flt.njmim.classif.<br>kknn      | 0.66722<br>81 | 0.2783051<br>73 | 0.72      | 0.55789474 |
| timika.num_scale.classif.ranger                           | 0.65319<br>3  | 0.2747216<br>68 | 0.7066667 | 0.56842105 |
| ffact.cb.enc.zv.num_scale.flt.auc.classif.ra<br>nger      | 0.66694<br>74 | 0.2747216<br>68 | 0.7066667 | 0.56842105 |
| ffact.cb.enc.zv.num_scale.pca.classif.rang<br>er          | 0.67024<br>56 | 0.2712772<br>65 | 0.5866667 | 0.68421053 |
| ffact.enc.zv.num_scale.flt.njmim.classif.na<br>ive_bayes  | 0.67838<br>6  | 0.2645800<br>31 | 0.8       | 0.45263158 |
| ffact.cb.enc.zv.num_scale.pca.classif.log_r<br>eg         | 0.66631<br>58 | 0.2619571<br>6  | 0.7333333 | 0.52631579 |

|                                                         |               |                 |           |            |
|---------------------------------------------------------|---------------|-----------------|-----------|------------|
| timika.num_scale.classif.xgboost                        | 0.63726<br>32 | 0.2610956<br>07 | 0.6933333 | 0.56842105 |
| ffact.enc.zv.num_scale.flt.njmim.classif.kknn           | 0.67607<br>02 | 0.2602752<br>47 | 0.76      | 0.49473684 |
| timika.num_scale.cb.classif.naive_bayes                 | 0.65649<br>12 | 0.2580948<br>68 | 0.72      | 0.53684211 |
| timika.num_scale.classif.svm                            | 0.63221<br>05 | 0.2517322<br>49 | 0.6       | 0.65263158 |
| ffact.cb.enc.zv.num_scale.flt.njmim.classif.naive_bayes | 0.65656<br>14 | 0.2499759<br>12 | 0.8133333 | 0.42105263 |
| timika.num_scale.cb.classif.nnet                        | 0.65649<br>12 | 0.2479921<br>39 | 0.72      | 0.52631579 |
| ffact.cb.enc.zv.num_scale.flt.njmim.classif.nnet        | 0.64463<br>16 | 0.2460671<br>29 | 0.6266667 | 0.62105263 |
| ffact.cb.enc.zv.num_scale.flt.njmim.classif.rpart       | 0.62301<br>75 | 0.2454016<br>78 | 0.56      | 0.68421053 |
| ffact.enc.zv.num_scale.flt.njmim.classif.rpart          | 0.68603<br>51 | 0.2388899<br>24 | 0.2933333 | 0.89473684 |
| timika.num_scale.classif.log_reg                        | 0.65649<br>12 | 0.2386959<br>84 | 0.5866667 | 0.65263158 |
| timika.num_scale.classif.multinom                       | 0.65649<br>12 | 0.2386959<br>84 | 0.5866667 | 0.65263158 |
| ffact.enc.zv.num_scale.flt.njmim.classif.cv_glmnet      | 0.67614<br>04 | 0.2386959<br>84 | 0.5866667 | 0.65263158 |
| ffact.enc.zv.num_scale.flt.njmim.classif.svm            | 0.67319<br>3  | 0.2386959<br>84 | 0.5866667 | 0.65263158 |
| timika.num_scale.cb.classif.ranger                      | 0.66084<br>21 | 0.2372960<br>08 | 0.68      | 0.55789474 |
| ffact.cb.enc.zv.num_scale.flt.auc.classif.kknn          | 0.62736<br>84 | 0.2340389<br>47 | 0.6666667 | 0.56842105 |
| ffact.cb.enc.zv.num_scale.flt.mrmr.classif.xgboost      | 0.64238<br>6  | 0.2324484<br>72 | 0.5466667 | 0.68421053 |
| timika.num_scale.classif.kknn                           | 0.66477<br>19 | 0.2313835<br>79 | 0.84      | 0.36842105 |
| ffact.enc.zv.num_scale.flt.njmim.classif.glmnet         | 0.68470<br>18 | 0.2303696<br>5  | 0.6       | 0.63157895 |
| ffact.cb.enc.zv.num_scale.flt.auc.classif.xgboost       | 0.63298<br>25 | 0.2270658<br>68 | 0.68      | 0.54736842 |
| timika.num_scale.cb.classif.kknn                        | 0.65410<br>53 | 0.2254002<br>87 | 0.8266667 | 0.37894737 |
| ffact.cb.enc.zv.num_scale.flt.auc.classif.nnet          | 0.65578<br>95 | 0.2237619<br>99 | 0.6666667 | 0.55789474 |
| ffact.cb.enc.zv.num_scale.pca.classif.xgbo              | 0.61922       | 0.2194776       | 0.5333333 | 0.68421053 |

|                                                         |           |              |            |            |
|---------------------------------------------------------|-----------|--------------|------------|------------|
| ost                                                     | 81        | 21           |            |            |
| ffact.cb.enc.zv.num_scale.flt.auc.classif.naive_bayes   | 0.6817544 | 0.219443561  | 0.7866667  | 0.42105263 |
| ffact.enc.zv.num_scale.flt.njmim.classif.ranger         | 0.6828772 | 0.202914311  | 0.49333333 | 0.70526316 |
| ffact.cb.enc.zv.num_scale.flt.njmim.classif.ranger      | 0.6682807 | 0.197449626  | 0.53333333 | 0.66315789 |
| ffact.cb.enc.zv.num_scale.pca.classif.svm               | 0.678386  | 0.197449626  | 0.53333333 | 0.66315789 |
| ffact.cb.enc.zv.num_scale.flt.njmim.classif.xgboost     | 0.6248421 | 0.193460333  | 0.5066667  | 0.68421053 |
| ffact.cb.enc.zv.num_scale.pca.classif.multinom          | 0.6685614 | 0.18616679   | 0.68       | 0.50526316 |
| ffact.cb.enc.zv.num_scale.pca.classif.glmnet            | 0.6400702 | 0.183968835  | 0.77333333 | 0.4        |
| ffact.cb.enc.zv.num_scale.pca.classif.rpart             | 0.6038596 | 0.182617134  | 0.41333333 | 0.75789474 |
| ffact.cb.enc.zv.num_scale.flt.mrmr.classif.kknn         | 0.7187368 | 0.179349807  | 0.84       | 0.31578947 |
| ffact.cb.enc.zv.num_scale.pca.classif.kknn              | 0.6215439 | 0.169277792  | 0.49333333 | 0.67368421 |
| ffact.cb.enc.zv.num_scale.pca.classif.naive_bayes       | 0.6355789 | 0.163928656  | 0.85333333 | 0.28421053 |
| ffact.cb.enc.zv.num_scale.pca.classif.nnet              | 0.6329123 | 0.155776562  | 0.3866667  | 0.75789474 |
| ffact.cb.enc.zv.num_scale.pca.classif.cv_glmnet         | 0.6386667 | 0.139639461  | 0.73333333 | 0.4        |
| ffact.cb.enc.zv.num_scale.flt.mrmr.classif.featureless  | 0.5       | 0.130316753  | 0.57333333 | 0.55789474 |
| ffact.enc.zv.num_scale.flt.njmim.classif.xgboost        | 0.6146667 | 0.10097508   | 0.41333333 | 0.68421053 |
| ffact.cb.enc.zv.num_scale.flt.njmim.classif.featureless | 0.5       | 0.091519708  | 0.5866667  | 0.50526316 |
| ffact.cb.enc.zv.num_scale.pca.classif.featureless       | 0.5       | 0.059234888  | 0.53333333 | 0.52631579 |
| timika.num_scale.classif.featureless                    | 0.5       | 0            | 0          | 1          |
| ffact.enc.zv.num_scale.flt.njmim.classif.featureless    | 0.5       | 0            | 0          | 1          |
| ffact.cb.enc.zv.num_scale.flt.auc.classif.featureless   | 0.5       | -0.000699988 | 0.5466667  | 0.45263158 |
| timika.num_scale.cb.classif.featureless                 | 0.5       | -0.0097895   | 0.45333333 | 0.53684211 |

|                                             |         |           |           |            |
|---------------------------------------------|---------|-----------|-----------|------------|
|                                             |         | 88        |           |            |
| ffact.cb.enc.zv.num_scale.flt.mrmr.classif. | 0.65789 | -         | 0.9866667 | 0.01052632 |
| naive_bayes                                 | 47      | 0.0129261 |           |            |
|                                             |         | 12        |           |            |

485

486 The machine learning pipeline is shown in the pipeline column. Model performance metrics  
487 include Area under the curve (classif.auc), Balanced accuracy (classif.bacc), Matthew's  
488 Correlation Coefficient (classif.mcc), Sensitivity (classif.sensitivity), and Specificity  
489 (classif.specificity). Each cell represents the metric for the performance on the 30% held-out  
490 validation test set after training on the 70% training data. Pipelines using only the Timika Score  
491 for prediction start with Timika in the pipeline name. Each pipeline shows all steps used in the  
492 pipeline ending with the machine learning algorithm used and are ordered by classif.mcc.  
493

494 We hypothesized that the second prediction task might demonstrate a performance boost  
495 in predictive power since the 2+ sputum status or higher (very high pathogen load in the sputum)  
496 showed a larger difference in Timika Score compared to negative. For this prediction task, we  
497 removed the borderline 1 to 9 in 100 and 1+ sputum test results from the analysis. 5-fold cross  
498 validation results on training set confirmed our hypothesis as we observed increases in  
499 performance for reported metrics (Table 4) for both top 5 features pipelines as well as Timika  
500 Score only workflows. In general, we observed equivalent performance from Timika Score only  
501 pipelines to workflows using the top 5 predictive features from various feature selection  
502 algorithms. The benchmarking suggests that while possible to achieve additional gains from the  
503 set of derived radiologist observations, these would likely be minimal. Interestingly, though this  
504 prediction problem shows a moderate class imbalance, the incorporation of class balancing did  
505 not significantly increase or impair performance for the pipelines. When we tested models  
506 trained on the entire training set on a validation set of 30% held out data, we saw similar  
507 predictive performance to our observation of the 5-fold cross-validated results on the training set  
508 (Table 5).

509 **Table 4. Comparison of machine learning pipeline performance via 5-fold cross-validation**  
 510 **for predicting high bacterial load positive (2+ or higher) versus negative sputum**  
 511 **microscopy status on training data.**  
 512

| <b>pipeline</b>                                       | <b>classif.au<br/>c</b> | <b>classif.mc<br/>c</b> | <b>classif.sensit<br/>ivity</b> | <b>classif.specif<br/>icity</b> |
|-------------------------------------------------------|-------------------------|-------------------------|---------------------------------|---------------------------------|
| timika.num_scale.cb.classif.naive_bayes               | 0.77 +/-<br>0.06        | 0.5 +/-<br>0.09         | 0.72 +/- 0.04                   | 0.74 +/- 0.13                   |
| ffact.enc.zv.num_scale.flt.njmim.classif.ranger       | 0.78 +/-<br>0.07        | 0.49 +/-<br>0.09        | 0.84 +/- 0.05                   | 0.65 +/- 0.15                   |
| ffact.cb.enc.zv.num_scale.flt.njmim.classif.glmnet    | 0.76 +/-<br>0.06        | 0.48 +/-<br>0.1         | 0.75 +/- 0.04                   | 0.7 +/- 0.07                    |
| ffact.cb.enc.zv.num_scale.flt.njmim.classif.multinom  | 0.78 +/-<br>0.04        | 0.48 +/-<br>0.1         | 0.81 +/- 0                      | 0.7 +/- 0.07                    |
| ffact.cb.enc.zv.num_scale.flt.mrmr.classif.cv_glmnet  | 0.75 +/-<br>0.05        | 0.47 +/-<br>0.14        | 0.69 +/- 0.08                   | 0.75 +/- 0.07                   |
| ffact.cb.enc.zv.num_scale.flt.njmim.classif.cv_glmnet | 0.77 +/-<br>0.04        | 0.47 +/-<br>0.14        | 0.69 +/- 0.08                   | 0.75 +/- 0.1                    |
| timika.num_scale.cb.classif.log_reg                   | 0.77 +/-<br>0.06        | 0.47 +/-<br>0.14        | 0.69 +/- 0.08                   | 0.75 +/- 0.07                   |
| timika.num_scale.cb.classif.multinom                  | 0.77 +/-<br>0.06        | 0.47 +/-<br>0.14        | 0.69 +/- 0.08                   | 0.75 +/- 0.07                   |
| timika.num_scale.cb.classif.svm                       | 0.74 +/-<br>0.05        | 0.47 +/-<br>0.14        | 0.69 +/- 0.08                   | 0.75 +/- 0.07                   |
| timika.num_scale.classif.nnet                         | 0.77 +/-<br>0.06        | 0.47 +/-<br>0.12        | 0.75 +/- 0.03                   | 0.68 +/- 0.08                   |
| ffact.cb.enc.zv.num_scale.flt.auc.classif.glmnet      | 0.75 +/-<br>0.08        | 0.47 +/-<br>0.06        | 0.75 +/- 0.04                   | 0.7 +/- 0.15                    |
| ffact.cb.enc.zv.num_scale.flt.auc.classif.log_reg     | 0.75 +/-<br>0.03        | 0.44 +/-<br>0.16        | 0.81 +/- 0.03                   | 0.65 +/- 0.15                   |
| ffact.cb.enc.zv.num_scale.flt.njmim.classif.nnet      | 0.74 +/-<br>0.06        | 0.44 +/-<br>0.11        | 0.76 +/- 0.07                   | 0.63 +/- 0.2                    |
| ffact.cb.enc.zv.num_scale.flt.auc.classif.nnet        | 0.77 +/-<br>0.04        | 0.44 +/-<br>0.07        | 0.72 +/- 0.12                   | 0.74 +/- 0.16                   |
| ffact.cb.enc.zv.num_scale.flt.auc.classif.rpart       | 0.75 +/-<br>0.09        | 0.43 +/-<br>0.23        | 0.69 +/- 0.04                   | 0.8 +/- 0.15                    |
| ffact.cb.enc.zv.num_scale.flt.mrmr.classif.glmnet     | 0.7 +/-<br>0.08         | 0.43 +/-<br>0.15        | 0.69 +/- 0.08                   | 0.75 +/- 0.02                   |
| ffact.cb.enc.zv.num_scale.flt.auc.classif.multinom    | 0.75 +/-<br>0.06        | 0.42 +/-<br>0.19        | 0.75 +/- 0.04                   | 0.7 +/- 0.1                     |
| ffact.cb.enc.zv.num_scale.flt.auc.classif.svm         | 0.73 +/-<br>0.06        | 0.42 +/-<br>0.19        | 0.75 +/- 0.04                   | 0.7 +/- 0.1                     |
| ffact.cb.enc.zv.num_scale.flt.njmim.classif           | 0.78 +/-                | 0.42 +/-                | 0.78 +/- 0.04                   | 0.7 +/- 0.18                    |



|                                                       |               |               |               |               |
|-------------------------------------------------------|---------------|---------------|---------------|---------------|
| f.log_reg                                             | 0.04          | 0.19          |               |               |
| ffact.cb.enc.zv.num_scale.flt.njmim.classif.svm       | 0.75 +/- 0.04 | 0.42 +/- 0.16 | 0.72 +/- 0.08 | 0.75 +/- 0.07 |
| timika.num_scale.cb.classif.nnet                      | 0.72 +/- 0.07 | 0.41 +/- 0.1  | 0.69 +/- 0.04 | 0.74 +/- 0.09 |
| ffact.cb.enc.zv.num_scale.flt.njmim.classif.ranger    | 0.78 +/- 0.06 | 0.41 +/- 0.02 | 0.72 +/- 0.07 | 0.68 +/- 0.1  |
| ffact.cb.enc.zv.num_scale.flt.auc.classif.ranger      | 0.73 +/- 0.11 | 0.4 +/- 0.17  | 0.67 +/- 0.03 | 0.75 +/- 0.07 |
| ffact.cb.enc.zv.num_scale.pca.classif.ranger          | 0.74 +/- 0.04 | 0.37 +/- 0.06 | 0.65 +/- 0.06 | 0.75 +/- 0.02 |
| ffact.cb.enc.zv.num_scale.flt.auc.classif.naive_bayes | 0.74 +/- 0.03 | 0.36 +/- 0.14 | 0.81 +/- 0.05 | 0.5 +/- 0.07  |
| ffact.enc.zv.num_scale.flt.njmim.classif.log_reg      | 0.75 +/- 0.06 | 0.36 +/- 0.14 | 0.89 +/- 0    | 0.5 +/- 0.07  |
| ffact.enc.zv.num_scale.flt.njmim.classif.multinom     | 0.75 +/- 0.06 | 0.36 +/- 0.14 | 0.89 +/- 0    | 0.5 +/- 0.07  |
| timika.num_scale.cb.classif.ranger                    | 0.7 +/- 0.08  | 0.36 +/- 0.08 | 0.69 +/- 0.04 | 0.58 +/- 0.16 |
| timika.num_scale.classif.svm                          | 0.75 +/- 0    | 0.36 +/- 0.06 | 0.81 +/- 0.04 | 0.5 +/- 0.12  |
| ffact.cb.enc.zv.num_scale.flt.mrmr.classif.multinom   | 0.67 +/- 0.13 | 0.35 +/- 0.26 | 0.68 +/- 0.05 | 0.7 +/- 0.13  |
| ffact.cb.enc.zv.num_scale.flt.mrmr.classif.log_reg    | 0.66 +/- 0.1  | 0.35 +/- 0.2  | 0.69 +/- 0.04 | 0.68 +/- 0.12 |
| ffact.cb.enc.zv.num_scale.flt.auc.classif.cv_glmnet   | 0.72 +/- 0.07 | 0.35 +/- 0.19 | 0.69 +/- 0.08 | 0.7 +/- 0.07  |
| ffact.enc.zv.num_scale.flt.njmim.classif.svm          | 0.78 +/- 0.04 | 0.35 +/- 0.19 | 0.86 +/- 0.04 | 0.5 +/- 0.15  |
| ffact.cb.enc.zv.num_scale.flt.mrmr.classif.nnet       | 0.66 +/- 0.07 | 0.35 +/- 0.17 | 0.75 +/- 0.08 | 0.74 +/- 0.02 |
| ffact.cb.enc.zv.num_scale.flt.njmim.classif.rpart     | 0.75 +/- 0.02 | 0.34 +/- 0.17 | 0.72 +/- 0.04 | 0.8 +/- 0.06  |
| timika.num_scale.cb.classif.kknn                      | 0.71 +/- 0.08 | 0.34 +/- 0.1  | 0.75 +/- 0.07 | 0.6 +/- 0.11  |
| ffact.enc.zv.num_scale.flt.njmim.classif.glmnet       | 0.75 +/- 0.06 | 0.34 +/- 0.09 | 0.86 +/- 0.03 | 0.45 +/- 0.04 |
| ffact.enc.zv.num_scale.flt.njmim.classif.rpart        | 0.7 +/- 0.04  | 0.34 +/- 0.08 | 0.78 +/- 0.09 | 0.47 +/- 0.11 |
| timika.num_scale.classif.ranger                       | 0.68 +/- 0.05 | 0.34 +/- 0.01 | 0.78 +/- 0.03 | 0.53 +/- 0.04 |
| timika.num_scale.cb.classif.xgboost                   | 0.73 +/- 0.03 | 0.33 +/- 0.11 | 0.61 +/- 0.04 | 0.63 +/- 0.08 |

|                                                         |               |               |               |               |
|---------------------------------------------------------|---------------|---------------|---------------|---------------|
| ffact.cb.enc.zv.num_scale.flt.auc.classif.kknn          | 0.73 +/- 0.05 | 0.33 +/- 0.01 | 0.7 +/- 0.03  | 0.63 +/- 0.03 |
| ffact.cb.enc.zv.num_scale.flt.njmim.classif.net         | 0.65 +/- 0.09 | 0.32 +/- 0.13 | 0.81 +/- 0.07 | 0.5 +/- 0.04  |
| timika.num_scale.classif.rpart                          | 0.69 +/- 0.07 | 0.32 +/- 0.1  | 0.81 +/- 0.12 | 0.53 +/- 0.08 |
| ffact.cb.enc.zv.num_scale.flt.mrmr.classif.ranger       | 0.68 +/- 0.14 | 0.31 +/- 0.16 | 0.75 +/- 0.11 | 0.65 +/- 0.11 |
| ffact.cb.enc.zv.num_scale.flt.njmim.classif.kknn        | 0.72 +/- 0.07 | 0.31 +/- 0.06 | 0.84 +/- 0.03 | 0.45 +/- 0.2  |
| timika.num_scale.classif.xgboost                        | 0.72 +/- 0.03 | 0.31 +/- 0.03 | 0.83 +/- 0.07 | 0.47 +/- 0.04 |
| ffact.cb.enc.zv.num_scale.flt.mrmr.classif.svm          | 0.71 +/- 0.07 | 0.3 +/- 0.3   | 0.72 +/- 0.08 | 0.7 +/- 0.05  |
| ffact.cb.enc.zv.num_scale.pca.classif.nnet              | 0.65 +/- 0.04 | 0.3 +/- 0.17  | 0.57 +/- 0.1  | 0.68 +/- 0.1  |
| timika.num_scale.classif.kknn                           | 0.72 +/- 0.1  | 0.3 +/- 0.1   | 0.92 +/- 0    | 0.37 +/- 0.08 |
| ffact.cb.enc.zv.num_scale.flt.auc.classif.xgboost       | 0.7 +/- 0.12  | 0.3 +/- 0.08  | 0.72 +/- 0.08 | 0.7 +/- 0.07  |
| timika.num_scale.cb.classif.rpart                       | 0.71 +/- 0.04 | 0.29 +/- 0.19 | 0.67 +/- 0.04 | 0.65 +/- 0.11 |
| timika.num_scale.classif.log_reg                        | 0.77 +/- 0.06 | 0.29 +/- 0.06 | 0.86 +/- 0.04 | 0.35 +/- 0.05 |
| timika.num_scale.classif.multinom                       | 0.77 +/- 0.06 | 0.29 +/- 0.06 | 0.86 +/- 0.04 | 0.35 +/- 0.05 |
| ffact.cb.enc.zv.num_scale.flt.mrmr.classif.rpart        | 0.71 +/- 0.05 | 0.28 +/- 0.06 | 0.58 +/- 0.06 | 0.75 +/- 0.06 |
| ffact.cb.enc.zv.num_scale.flt.njmim.classif.naive_bayes | 0.72 +/- 0.06 | 0.27 +/- 0.07 | 0.83 +/- 0    | 0.45 +/- 0.15 |
| ffact.cb.enc.zv.num_scale.pca.classif.log_reg           | 0.74 +/- 0.06 | 0.26 +/- 0.1  | 0.69 +/- 0.08 | 0.5 +/- 0.04  |
| ffact.cb.enc.zv.num_scale.flt.mrmr.classif.xgboost      | 0.7 +/- 0.07  | 0.25 +/- 0.11 | 0.69 +/- 0.04 | 0.58 +/- 0.23 |
| timika.num_scale.classif.naive_bayes                    | 0.77 +/- 0.06 | 0.25 +/- 0.04 | 0.86 +/- 0.04 | 0.35 +/- 0.05 |
| ffact.cb.enc.zv.num_scale.pca.classif.cv_glmnet         | 0.68 +/- 0.13 | 0.24 +/- 0.2  | 0.69 +/- 0.12 | 0.5 +/- 0.12  |
| ffact.cb.enc.zv.num_scale.flt.njmim.classif.naive_bayes | 0.73 +/- 0.06 | 0.24 +/- 0.04 | 0.83 +/- 0.04 | 0.45 +/- 0.12 |
| ffact.cb.enc.zv.num_scale.pca.classif.kknn              | 0.65 +/- 0.02 | 0.24 +/- 0.02 | 0.65 +/- 0.03 | 0.65 +/- 0.07 |
| ffact.cb.enc.zv.num_scale.pca.classif.xgb               | 0.64 +/-      | 0.22 +/-      | 0.64 +/- 0.07 | 0.53 +/- 0.19 |

|                                                         |               |                |               |               |
|---------------------------------------------------------|---------------|----------------|---------------|---------------|
| oost                                                    | 0.07          | 0.17           |               |               |
| ffact.cb.enc.zv.num_scale.pca.classif.rpart             | 0.6 +/- 0.07  | 0.22 +/- 0.13  | 0.61 +/- 0.08 | 0.53 +/- 0.04 |
| ffact.cb.enc.zv.num_scale.pca.classif.svm               | 0.69 +/- 0.13 | 0.22 +/- 0.12  | 0.67 +/- 0.08 | 0.74 +/- 0.09 |
| ffact.cb.enc.zv.num_scale.pca.classif.multinom          | 0.73 +/- 0.1  | 0.21 +/- 0.12  | 0.69 +/- 0.04 | 0.47 +/- 0.04 |
| ffact.cb.enc.zv.num_scale.flt.njmim.classif.xgboost     | 0.68 +/- 0.06 | 0.21 +/- 0.08  | 0.69 +/- 0.12 | 0.6 +/- 0.11  |
| ffact.cb.enc.zv.num_scale.flt.njmim.classif.xgboost     | 0.74 +/- 0.04 | 0.21 +/- 0.06  | 0.83 +/- 0.04 | 0.5 +/- 0.2   |
| ffact.cb.enc.zv.num_scale.pca.classif.glmnet            | 0.74 +/- 0.07 | 0.2 +/- 0.02   | 0.72 +/- 0.04 | 0.47 +/- 0.04 |
| ffact.cb.enc.zv.num_scale.flt.njmim.classif.kknn        | 0.65 +/- 0.1  | 0.19 +/- 0.07  | 0.67 +/- 0.08 | 0.55 +/- 0.04 |
| ffact.cb.enc.zv.num_scale.pca.classif.naive_bayes       | 0.7 +/- 0.01  | 0.17 +/- 0.14  | 0.83 +/- 0.04 | 0.3 +/- 0.1   |
| ffact.cb.enc.zv.num_scale.flt.njmim.classif.cv_glmnet   | 0.77 +/- 0.06 | 0.17 +/- 0.14  | 0.97 +/- 0.04 | 0.11 +/- 0.08 |
| ffact.cb.enc.zv.num_scale.flt.mrmr.classif.kknn         | 0.63 +/- 0.12 | 0.15 +/- 0.14  | 0.72 +/- 0.12 | 0.42 +/- 0.04 |
| ffact.cb.enc.zv.num_scale.flt.mrmr.classif.naive_bayes  | 0.72 +/- 0.01 | 0.1 +/- 0.11   | 0.94 +/- 0.08 | 0.16 +/- 0.23 |
| ffact.cb.enc.zv.num_scale.pca.classif.featureless       | 0.5 +/- 0     | 0.04 +/- 0.14  | 0.5 +/- 0.04  | 0.47 +/- 0.08 |
| ffact.cb.enc.zv.num_scale.flt.mrmr.classif.featureless  | 0.5 +/- 0     | 0.01 +/- 0.2   | 0.5 +/- 0.04  | 0.55 +/- 0.2  |
| ffact.cb.enc.zv.num_scale.flt.njmim.classif.featureless | 0.5 +/- 0     | 0 +/- 0        | 1 +/- 0       | 0 +/- 0       |
| timika.num_scale.classif.featureless                    | 0.5 +/- 0     | 0 +/- 0        | 1 +/- 0       | 0 +/- 0       |
| ffact.cb.enc.zv.num_scale.flt.njmim.classif.featureless | 0.5 +/- 0     | -0.1 +/- 0.1   | 0.53 +/- 0.08 | 0.47 +/- 0.11 |
| timika.num_scale.cb.classif.featureless                 | 0.5 +/- 0     | -0.03 +/- 0.05 | 0.5 +/- 0.04  | 0.47 +/- 0.04 |
| ffact.cb.enc.zv.num_scale.flt.auc.classif.featureless   | 0.5 +/- 0     | -0.02 +/- 0.23 | 0.47 +/- 0.12 | 0.5 +/- 0.15  |

513

514 The machine learning pipeline is shown in the pipeline column. Model performance metrics  
515 include Area under the curve (classif.auc), Balanced accuracy (classif.bacc), Matthew's  
516 Correlation Coefficient (classif.mcc), Sensitivity (classif.sensitivity), and Specificity  
517 (classif.specificity). Each cell represents the median metric +/- the MAD for the 5-fold cross  
518 validation testing on the training data representing 70% of the entire dataset. Pipelines using only

519 the Timika Score for prediction start with Timika in the pipeline name. Each pipeline shows all  
 520 steps used in the pipeline ending with the machine learning algorithm used and are ordered by  
 521 `classif.mcc`.  
 522

523 **Table 5. Comparison of machine learning pipeline performance for predicting high**  
 524 **bacterial load positive (2+ or higher) versus negative sputum microscopy status on**  
 525 **validation data.**  
 526

| pipeline                                                  | classif.a<br>uc | classif.m<br>cc | classif.sensiti<br>vity | classif.specifi<br>city |
|-----------------------------------------------------------|-----------------|-----------------|-------------------------|-------------------------|
| ffact.cb.enc.zv.num_scale.flt.njmim.classif.<br>log_reg   | 0.72511<br>63   | 0.455404<br>19  | 0.7466667               | 0.72093023              |
| ffact.cb.enc.zv.num_scale.flt.mrmr.classif.l<br>og_reg    | 0.72387<br>6    | 0.441316<br>61  | 0.7333333               | 0.72093023              |
| ffact.cb.enc.zv.num_scale.flt.mrmr.classif.<br>multinom   | 0.72527<br>13   | 0.441316<br>61  | 0.7333333               | 0.72093023              |
| ffact.cb.enc.zv.num_scale.flt.njmim.classif.<br>multinom  | 0.72434<br>11   | 0.433969<br>04  | 0.7466667               | 0.69767442              |
| timika.num_scale.cb.classif.rpart                         | 0.74108<br>53   | 0.427453<br>16  | 0.6533333               | 0.79069767              |
| timika.num_scale.cb.classif.log_reg                       | 0.71054<br>26   | 0.427426<br>16  | 0.72                    | 0.72093023              |
| timika.num_scale.cb.classif.multinom                      | 0.71054<br>26   | 0.427426<br>16  | 0.72                    | 0.72093023              |
| timika.num_scale.cb.classif.nnet                          | 0.71100<br>78   | 0.427426<br>16  | 0.72                    | 0.72093023              |
| timika.num_scale.cb.classif.svm                           | 0.69813<br>95   | 0.427426<br>16  | 0.72                    | 0.72093023              |
| ffact.cb.enc.zv.num_scale.flt.mrmr.classif.c<br>v_glmnet  | 0.71054<br>26   | 0.427426<br>16  | 0.72                    | 0.72093023              |
| ffact.cb.enc.zv.num_scale.flt.njmim.classif.<br>cv_glmnet | 0.71054<br>26   | 0.427426<br>16  | 0.72                    | 0.72093023              |
| ffact.cb.enc.zv.num_scale.flt.mrmr.classif.s<br>vm        | 0.71271<br>32   | 0.427426<br>16  | 0.72                    | 0.72093023              |
| ffact.cb.enc.zv.num_scale.flt.auc.classif.rpa<br>rt       | 0.74620<br>16   | 0.427066<br>17  | 0.76                    | 0.6744186               |
| ffact.cb.enc.zv.num_scale.flt.njmim.classif.<br>svm       | 0.71875<br>97   | 0.419769<br>12  | 0.7333333               | 0.69767442              |
| ffact.cb.enc.zv.num_scale.flt.auc.classif.log<br>_reg     | 0.75922<br>48   | 0.412539<br>25  | 0.7466667               | 0.6744186               |
| ffact.cb.enc.zv.num_scale.flt.auc.classif.mu<br>ltinom    | 0.75426<br>36   | 0.412539<br>25  | 0.7466667               | 0.6744186               |

|                                                             |               |                |           |            |
|-------------------------------------------------------------|---------------|----------------|-----------|------------|
| ffact.cb.enc.zv.num_scale.flt.auc.classif.nn<br>et          | 0.73689<br>92 | 0.412539<br>25 | 0.7466667 | 0.6744186  |
| timika.num_scale.cb.classif.naive_bayes                     | 0.71054<br>26 | 0.405770<br>29 | 0.72      | 0.69767442 |
| ffact.cb.enc.zv.num_scale.flt.auc.classif.cv_<br>glmnet     | 0.72914<br>73 | 0.405770<br>29 | 0.72      | 0.69767442 |
| ffact.cb.enc.zv.num_scale.flt.mrmr.classif.r<br>anger       | 0.72589<br>15 | 0.405770<br>29 | 0.72      | 0.69767442 |
| ffact.cb.enc.zv.num_scale.flt.auc.classif.gl<br>mnet        | 0.73968<br>99 | 0.398233<br>97 | 0.7333333 | 0.6744186  |
| ffact.cb.enc.zv.num_scale.flt.njmim.classif.<br>glmnet      | 0.71519<br>38 | 0.398233<br>97 | 0.7333333 | 0.6744186  |
| ffact.cb.enc.zv.num_scale.flt.auc.classif.sv<br>m           | 0.69472<br>87 | 0.398233<br>97 | 0.7333333 | 0.6744186  |
| ffact.cb.enc.zv.num_scale.flt.mrmr.classif.n<br>net         | 0.67395<br>35 | 0.391957<br>6  | 0.7066667 | 0.69767442 |
| ffact.cb.enc.zv.num_scale.flt.mrmr.classif.k<br>knn         | 0.73612<br>4  | 0.384348<br>12 | 0.76      | 0.62790698 |
| ffact.cb.enc.zv.num_scale.flt.mrmr.classif.<br>glmnet       | 0.72294<br>57 | 0.378316<br>79 | 0.6933333 | 0.69767442 |
| ffact.cb.enc.zv.num_scale.flt.auc.classif.ran<br>ger        | 0.71922<br>48 | 0.378316<br>79 | 0.6933333 | 0.69767442 |
| ffact.cb.enc.zv.num_scale.flt.njmim.classif.<br>ranger      | 0.70480<br>62 | 0.378316<br>79 | 0.6933333 | 0.69767442 |
| ffact.cb.enc.zv.num_scale.flt.auc.classif.nai<br>ve_bayes   | 0.74496<br>12 | 0.372004<br>82 | 0.7866667 | 0.58139535 |
| ffact.cb.enc.zv.num_scale.flt.mrmr.classif.r<br>part        | 0.73317<br>83 | 0.366981<br>06 | 0.6133333 | 0.76744186 |
| ffact.cb.enc.zv.num_scale.flt.njmim.classif.<br>naive_bayes | 0.73891<br>47 | 0.361219<br>78 | 0.8133333 | 0.53488372 |
| timika.num_scale.cb.classif.kknn                            | 0.74899<br>22 | 0.356440<br>32 | 0.8266667 | 0.51162791 |
| ffact.cb.enc.zv.num_scale.flt.njmim.classif.<br>kknn        | 0.72          | 0.348094<br>66 | 0.7466667 | 0.60465116 |
| ffact.cb.enc.zv.num_scale.flt.auc.classif.xg<br>boost       | 0.74341<br>09 | 0.340846<br>12 | 0.72      | 0.62790698 |
| ffact.cb.enc.zv.num_scale.flt.mrmr.classif.x<br>gboost      | 0.67798<br>45 | 0.338291<br>99 | 0.6533333 | 0.69767442 |
| timika.num_scale.cb.classif.ranger                          | 0.69968<br>99 | 0.334571<br>34 | 0.6266667 | 0.72093023 |
| ffact.cb.enc.zv.num_scale.flt.njmim.classif.nai<br>ve_bayes | 0.73364<br>34 | 0.317888<br>57 | 0.8133333 | 0.48837209 |
| ffact.cb.enc.zv.num_scale.flt.njmim.classif.                | 0.72263       | 0.316467       | 0.5333333 | 0.79069767 |

|                                                     |           |            |           |            |
|-----------------------------------------------------|-----------|------------|-----------|------------|
| rpart                                               | 57        | 3          |           |            |
| ffact.cb.enc.zv.num_scale.flt.njmim.classif.nnet    | 0.644186  | 0.312863   | 0.6933333 | 0.62790698 |
| timika.num_scale.classif.nnet                       | 6         | 89         |           |            |
| ffact.cb.enc.zv.num_scale.flt.njmim.classif.xgboost | 0.7105426 | 0.3118412  | 0.7333333 | 0.58139535 |
| ffact.cb.enc.zv.num_scale.pca.classif.glmnet        | 0.7010853 | 0.3090816  | 0.6       | 0.72093023 |
| ffact.cb.enc.zv.num_scale.pca.classif.range         | 0.7029457 | 0.30499956 | 0.7066667 | 0.60465116 |
| ffact.cb.enc.zv.num_scale.pca.classif.range         | 0.7091473 | 0.30302833 | 0.64      | 0.6744186  |
| ffact.enc.zv.num_scale.flt.njmim.classif.log_reg    | 0.7203101 | 0.30141157 | 0.8       | 0.48837209 |
| ffact.enc.zv.num_scale.flt.njmim.classif.multinom   | 0.7203101 | 0.30141157 | 0.8       | 0.48837209 |
| ffact.enc.zv.num_scale.flt.njmim.classif.range      | 0.7215504 | 0.30141157 | 0.8       | 0.48837209 |
| timika.num_scale.classif.svm                        | 0.6826357 | 0.29154447 | 0.7733333 | 0.51162791 |
| ffact.cb.enc.zv.num_scale.pca.classif.cv_glmnet     | 0.6948837 | 0.29008201 | 0.7333333 | 0.55813953 |
| ffact.cb.enc.zv.num_scale.pca.classif.kknn          | 0.7207752 | 0.28582435 | 0.84      | 0.41860465 |
| ffact.cb.enc.zv.num_scale.pca.classif.rpart         | 0.7221705 | 0.27722881 | 0.68      | 0.60465116 |
| timika.num_scale.classif.log_reg                    | 0.7105426 | 0.27363304 | 0.8133333 | 0.44186047 |
| timika.num_scale.classif.multinom                   | 0.7105426 | 0.27363304 | 0.8133333 | 0.44186047 |
| timika.num_scale.classif.naive_bayes                | 0.7105426 | 0.27363304 | 0.8133333 | 0.44186047 |
| ffact.cb.enc.zv.num_scale.pca.classif.svm           | 0.7128682 | 0.27363304 | 0.8133333 | 0.44186047 |
| ffact.cb.enc.zv.num_scale.pca.classif.svm           | 0.7190698 | 0.25879866 | 0.64      | 0.62790698 |
| ffact.cb.enc.zv.num_scale.flt.njmim.classif.glmnet  | 0.7210853 | 0.25701037 | 0.8       | 0.44186047 |
| ffact.cb.enc.zv.num_scale.flt.auc.classif.kknn      | 0.6857364 | 0.25366746 | 0.72      | 0.53488372 |
| ffact.cb.enc.zv.num_scale.pca.classif.multinom      | 0.7032558 | 0.24622423 | 0.7333333 | 0.51162791 |
| ffact.cb.enc.zv.num_scale.pca.classif.kknn          | 0.6351938 | 0.24178566 | 0.6       | 0.65116279 |

|                                                         |               |                     |           |            |
|---------------------------------------------------------|---------------|---------------------|-----------|------------|
| timika.num_scale.classif.ranger                         | 0.69426<br>36 | 0.240785<br>07      | 0.7866667 | 0.44186047 |
| ffact.enc.zv.num_scale.flt.njmim.classif.xgboost        | 0.70325<br>58 | 0.240785<br>07      | 0.7866667 | 0.44186047 |
| ffact.enc.zv.num_scale.flt.njmim.classif.rpart          | 0.67147<br>29 | 0.234748<br>13      | 0.8533333 | 0.34883721 |
| timika.num_scale.cb.classif.xgboost                     | 0.68093<br>02 | 0.232501<br>03      | 0.6133333 | 0.62790698 |
| ffact.cb.enc.zv.num_scale.pca.classif.nnet              | 0.69023<br>26 | 0.231627<br>91      | 0.72      | 0.51162791 |
| ffact.enc.zv.num_scale.flt.njmim.classif.cv_glmnet      | 0.70976<br>74 | 0.217485<br>43      | 0.9066667 | 0.25581395 |
| ffact.enc.zv.num_scale.flt.njmim.classif.nnet           | 0.66728<br>68 | 0.198541<br>5       | 0.8266667 | 0.34883721 |
| ffact.cb.enc.zv.num_scale.pca.classif.logreg            | 0.70387<br>6  | 0.197459<br>88      | 0.6666667 | 0.53488372 |
| ffact.cb.enc.zv.num_scale.pca.classif.naive_bayes       | 0.67100<br>78 | 0.186109<br>83      | 0.8533333 | 0.30232558 |
| timika.num_scale.classif.xgboost                        | 0.70341<br>09 | 0.181277<br>05      | 0.8133333 | 0.34883721 |
| timika.num_scale.classif.rpart                          | 0.68682<br>17 | 0.171862<br>41      | 0.7866667 | 0.37209302 |
| timika.num_scale.classif.kknn                           | 0.70744<br>19 | 0.127279<br>1       | 0.8666667 | 0.23255814 |
| ffact.cb.enc.zv.num_scale.flt.auc.classif.featureless   | 0.5           | 0.097651<br>87      | 0.52      | 0.58139535 |
| ffact.cb.enc.zv.num_scale.pca.classif.featureless       | 0.5           | 0.050307<br>08      | 0.5866667 | 0.46511628 |
| ffact.cb.enc.zv.num_scale.pca.classif.xgboost           | 0.58046<br>51 | 0.049608<br>19      | 0.4933333 | 0.55813953 |
| ffact.cb.enc.zv.num_scale.flt.mrmr.classif.naive_bayes  | 0.71674<br>42 | 0.036994<br>84      | 0.9866667 | 0.02325581 |
| ffact.cb.enc.zv.num_scale.flt.mrmr.classif.featureless  | 0.5           | 0.027175<br>29      | 0.4933333 | 0.53488372 |
| ffact.cb.enc.zv.num_scale.flt.njmim.classif.featureless | 0.5           | 0.011382<br>35      | 0.5466667 | 0.46511628 |
| timika.num_scale.classif.featureless                    | 0.5           | 0                   | 1         | 0          |
| ffact.enc.zv.num_scale.flt.njmim.classif.featureless    | 0.5           | 0                   | 1         | 0          |
| timika.num_scale.cb.classif.featureless                 | 0.5           | -<br>0.097651<br>87 | 0.48      | 0.41860465 |

528 The machine learning pipeline is shown in the pipeline column. Model performance metrics  
529 include Area under the curve (classif.auc), Balanced accuracy (classif.bacc), Matthew's  
530 Correlation Coefficient (classif.mcc), Sensitivity (classif.sensitivity), and Specificity  
531 (classif.specificity). Each cell represents the metric for the performance on the 30% held-out  
532 validation test set after training on the 70% training data. Pipelines using only the Timika Score  
533 for prediction start with Timika in the pipeline name. Each pipeline shows all steps used in the  
534 pipeline ending with the machine learning algorithm used and are ordered by classif.mcc.  
535

## 536 **Comparison of best performing feature selection and Timika-only models by** 537 **bootstrapping**

538        Though our initial training and validation testing suggested that Timika Score only  
539 pipelines showed minimal differences with the top 5 feature models, we wanted to further test  
540 this for statistical significance. We chose the best performing class-balanced pipelines from the  
541 5-fold cross validated results obtained from the training data. Thus, the best top 5 feature  
542 pipeline, Timika Score only pipeline, and a featureless pipeline were selected for further testing.  
543 The featureless workflow is a control that would reveal the density of results expected due to  
544 random chance regardless of any upstream preprocessing given that classes are balanced. We  
545 perform a bootstrapping without replacement ( $N = 200$ ) on the entire dataset using 70% of the  
546 data for training and 30% for testing on each split.

547        The bootstrapping result on the prediction problem attempting to distinguish positive  
548 from negative sputum results showed that the performance of the best top 5 feature pipeline was  
549 slightly better than the Timika-only pipeline. Both showed significantly improved performance  
550 from the workflow using a featureless model (Fig 4A). The bootstrapping on the prediction  
551 problem attempting to distinguish higher bacterial load sputum results (2+ or higher compared to  
552 negative) did not show any difference in performance for the best Timika-only pipeline  
553 compared to the best top 5 workflow (Fig 4B). As before, both pipelines performed significantly



554 better than the workflow using the featureless model. These results are consistent with the idea  
555 that Timika offers generally equivalent predictive performance to using the top 5 features from  
556 the dataset. Inclusion of other features may offer minimal improvements in predictive  
557 performance depending upon the model or set of features selected.

558 **Fig 4. Comparison of best class-balanced pipelines via bootstrapping without replacement**  
559 **(N = 200).** The best class-balanced pipelines via 5-fold cross-validation performance on training  
560 data were selected for comparison to assess using top 5 features via feature selection or  
561 dimensionality reduction as compared to using only Timika Score. A featureless pipeline is used  
562 as a control to show expected performance via random selection of outcome. Box plots with  
563 interquartile range are overlaid on density plots showing the density of results of Matthew's  
564 Correlation Coefficient across all bootstrapping results per pipeline. Performance is compared  
565 across all groups by Kruskal-Wallis and by individual pairs using Wilcoxon test which are  
566 shown by the brackets. In A), the performance of the best pipelines for predicting positive (1 to 9  
567 in 100, 1+, or higher) versus negative is shown whereas B) the performance of the best pipelines  
568 for predicting high bacterial load positive (2+ or higher) versus negative is shown. Interestingly  
569 there is a statistically significant difference between top 5 feature pipeline versus Timika Score  
570 pipeline in A) and no significant difference in performance for Timika Score pipeline in B). This  
571 shows that additional derived features from radiologist observations may result in small  
572 performance gains although Timika Score alone provides generally equivalent prediction  
573 performance for the identified best models.  
574

## 575 Discussion

576 X ray imaging is a useful approach to diagnose and monitor disease progression and  
577 status during routine TB clinical management. X ray imaging cannot discern the type of  
578 resistance of tuberculosis as well as characterize the amount of pathogen in sputum, which only  
579 microbiological methods can provide. These approaches assist clinicians with a more complete  
580 understanding of the case and understanding their relationship is important. CXR is relatively  
581 less expensive than other imaging modalities such as CT permitting its wider use especially in  
582 LMIC that may face challenges with infrastructure cost to support routine CT use. Using CXRs,  
583 radiologists can report on a variety of observations that determine lung biomarker status such as  
584 overall abnormal volume of the lungs, presence of cavity, and presence of nodule, which the TB

585 Portals resource collects, standardizes, and provides as part of the patient record. Here we  
586 investigated the previously reported Timika Score that can be derived from CXR radiologist  
587 observations to characterize pre-treatment severity of disease. TB portals provides a unique real-  
588 world repository of TB cases, especially drug resistant cases to bridge across distinct domains  
589 including radiological, pathogen genomic, microbiological, and clinical features; it is especially  
590 suited to serve as a large reference resource for assessing derived scores like Timika Score for  
591 testing in a real-world database of especially challenging TB cases. Our goal was to assess the  
592 plausibility and utility of the derived Timika Score within this real-world resource by studying its  
593 relationships to the other available case characteristics.

594 We demonstrate that Timika Score associates with other case characteristics consistent  
595 with prior reporting of TB clinical risk factors. For instance, we show that images from patients  
596 with a lower BMI tended to have a higher Timika Score and less of a change from the initial  
597 CXR to the last available CXR. TB and BMI have been reported to show a strongly logarithmic  
598 association and there was reported fivefold increase in age-adjusted incidence of new pulmonary  
599 TB in lowest BMI group compared to highest in a study of 1.7 million Norwegians (18, 19). In  
600 the same report, Tverdal mention an interesting U-shaped association with BMI and all-cause  
601 mortality which is strikingly like the U-shaped association we observed with Timika Score and  
602 BMI. In our analysis, increasing age tended to associate with higher Timika Score and less of a  
603 change from the initial CXR to the last available CXR. This is consistent with higher mortality,  
604 morbidity, and risk of TB with increasing age especially since the symptoms of TB may be  
605 confused with other age-related illnesses (20) resulting in delayed diagnosis or treatment.  
606 Moreover, when comparing Timika Score with other clinical factors associated with the case, we  
607 observe both higher Timika Scores and lower relative changes in Timika Score in cases with

608 higher-risk clinical factors (XDR, Relapse, etc.) or poor reported outcomes (e.g. Treatment  
609 failure, Died, etc.). This is consistent with prior reports examining predictors that affect change  
610 in radiological lesions over the course of treatment monitoring (13).

611 Finally, we demonstrated that Timika Score show a clear and statistically significant  
612 predictive capacity for baseline, pre-treatment sputum microscopy status in the cohort of new  
613 cases we identified from the TB Portals repository. This is important because the original reports  
614 on Timika Score suggested the same association on a smaller dataset (15) that did not span  
615 across the wide-range of participating sites from 14 countries. Taken together, these  
616 observations support that the Timika Scores we are calculating reflect lung biomarker status  
617 consistent with accumulated knowledge of the radiological and clinical associations in TB  
618 disease.

619 This analysis has several limitations and caveats when interpreting results. The TB  
620 Portals is a real-world data repository to better understand DR TB so it is challenging to separate  
621 identified associations with other observed or unobserved variables from the case. Moreover,  
622 respective images and test results for each case are not collected uniformly in time but rather as  
623 clinical management of the case allows. We select cases for inclusion into the analysis cohort  
624 based upon criteria we believe will accurately represent associations between images and  
625 microbiological test results but we cannot rule out timing or other aspects of the case impacting  
626 the associations we observe. For example, we noted both lungs involvement of calcified nodule  
627 as showing higher risk of pre-treatment sputum positivity. Such a marker suggests a long-term  
628 prior history of pulmonary TB that might not be reflected in the “New” case definition from  
629 WHO. Collecting a prior history of chronic lung symptoms around the baseline sample  
630 collection might allow us to see if the relationships we identified remain after stratifying by

631 these symptoms that could suggest a period of prior disease burden. Given these caveats, the  
632 modeling and visualizations need to be interpreted as hypothesis-generating.

633 A key goal of this study was to identify a risk score (either new or previously reported)  
634 that could encapsulate a temporal snapshot of case dynamics relating to disease risk such as poor  
635 outcome or infectiousness. The CXR derived Timika Score may provide a useful score in this  
636 regard from the initial testing we performed. One caution with regards to the utility of Timika  
637 Score from this analysis is that the risks and associations with sputum microscopy positivity  
638 were calculated for samples taken prior to treatment. The dynamics of microbiological status in  
639 sputum might not reflect the same dynamics of lung biomarkers in response to treatment. Given  
640 these dynamics, applying the same risks from Timika Score for sputum positivity (i.e. presence  
641 of pathogen in sputum) after treatment is not advisable and may require new approaches that  
642 stratify by type of resistance and different treatment regimens. It also may require additional data  
643 collection to support the requisite number of cases given the real-world nature of the resource  
644 where only subsets of cases may meet the inclusion and exclusion criteria for analysis.

645 The temporal relationships between lung status (as observed in CXR images) and  
646 bacterial pathogen load in the sputum (as observed by microscopy) are complex. For instance, at  
647 the beginning of disease, radiological features may not be detectable in the lungs despite the  
648 presence of bacteria in sputum. Meanwhile, towards the end of treatment, sputum may no longer  
649 contain TB pathogen indicating a non-infectious case; however, the pathogen may remain in  
650 certain areas of the lung such as cavities. Given these intricacies, additional research is  
651 warranted to determine if improvements can be made in Timika Score to account for these  
652 situations. Moreover, there may be limitations to the granularity of a clinical score like Timika  
653 that can be generated from CXRs given the limitations of the modality with regards to imaging

654 detail. It may be necessary for other modalities such as CT to account for more complex features  
655 such as the size of cavities, nodules or other aspects identified in the lung, which may not be  
656 obvious on a CXR. The assessment of clinical scores such as Timika Score coming from these  
657 various modalities is especially important for hard-to-treat cases such as MDR and XDR TB  
658 where scores can be compared in the context of other features of the case.

659         We observed the best predictive performance in models predicting higher bacterial load  
660 sputum status. This improvement in predictive performance for high bacterial load sputum  
661 statuses (e.g. 2+ or higher) illustrates the nuances associated with predicting sputum status from  
662 Timika Score. The borderline cases such as 1 to 9 in 100 or 1+ are more challenging to predict  
663 as pathogen load is only slightly higher than the negative status specimens and furthermore some  
664 negative samples may be false negatives. These false negatives may suffer from issues such as  
665 sensitivity due to the challenges of acquiring a usable sputum sample. Despite these nuances,  
666 our results confirm prior reported Timika Score utility for predicting baseline sputum positivity  
667 albeit with better performance for high-bacterial load sputum samples. The high pathogen load  
668 cases would also be among the most infectious and challenging to treat; therefore, we were  
669 satisfied to observe the higher predictive performance in this clinically important group. We  
670 believe that adding CXR-derived Timika Score to the TB Portals resource will open  
671 opportunities to other researchers to utilize this score to understand TB in a real-world setting.  
672 The score can serve as a reference from which to test against additional clinical scores that could  
673 be derived from the available set of features captured in TB portals.

## 674 **Acknowledgements**

675 We would like to thank Qinlu Wang, Jingwen Gu, and Ziv Yaniv for helpful suggestions; the  
676 MLR3 team for development of the MLR3 suite of packages. This research was supported in

677 part by the Office of Science Management and Operations (OSMO) of the NIAID. For their  
678 contributions to the vision and requirements of TB Portals, we would like to thank: Mike  
679 Tartakovsky, Darrell Hurt, Alina Grinev, and members of the TB Portals team.

## 680 References

681

- 682 1. Dheda K, Barry CE, & Maartens G (2016) Tuberculosis. *Lancet* 387(10024):1211-1226.
- 683 2. Chakaya J, *et al.* (2021) Global Tuberculosis Report 2020 - Reflections on the Global TB  
684 burden, treatment and prevention efforts. *Int J Infect Dis*.
- 685 3. Magro P, *et al.* (2020) Impact of the SARS-CoV-2 epidemic on tuberculosis treatment  
686 outcome in Northern Italy. *Eur Respir J* 56(4).
- 687 4. Migliori GB, *et al.* (2020) Worldwide Effects of Coronavirus Disease Pandemic on  
688 Tuberculosis Services, January-April 2020. *Emerg Infect Dis* 26(11):2709-2712.
- 689 5. Dheda K, *et al.* (2017) The epidemiology, pathogenesis, transmission, diagnosis, and  
690 management of multidrug-resistant, extensively drug-resistant, and incurable  
691 tuberculosis. *Lancet Respiratory Medicine* 5(4):291-360.
- 692 6. (WHO) WHO (2018) Global Tuberculosis report 2018.
- 693 7. Manjelienskaia J, Erck D, Piracha S, & Schragger L (2016) Drug-resistant TB: deadly,  
694 costly and in need of a vaccine. *Trans R Soc Trop Med Hyg* 110(3):186-191.
- 695 8. Desikan P (2013) Sputum smear microscopy in tuberculosis: is it still relevant? *Indian J*  
696 *Med Res* 137(3):442-444.
- 697 9. Olaru ID, Heyckendorf J, Grossmann S, & Lange C (2014) Time to culture positivity and  
698 sputum smear microscopy during tuberculosis therapy. *PLoS One* 9(8):e106075.
- 699 10. Su WJ, Feng JY, Chiu YC, Huang SF, & Lee YC (2011) Role of 2-month sputum smears  
700 in predicting culture conversion in pulmonary tuberculosis. *Eur Respir J* 37(2):376-383.
- 701 11. Saul EE, *et al.* (2020) The challenges of implementing low-dose computed tomography  
702 for lung cancer screening in low- and middle-income countries. *Nature Cancer*  
703 1(12):1140-1152.
- 704 12. Miller C, Lonroth K, Sotgiu G, & Migliori GB (2017) The long and winding road of  
705 chest radiography for tuberculosis detection. *Eur Respir J* 49(5).
- 706 13. Heo EY, *et al.* (2009) Radiographic improvement and its predictors in patients with  
707 pulmonary tuberculosis. *Int J Infect Dis* 13(6):e371-376.
- 708 14. Chakraborty A, Shivananjaiah AJ, Ramaswamy S, & Chikkavenkatappa N (2018) Chest  
709 X ray score (Timika score): an useful adjunct to predict treatment outcome in  
710 tuberculosis. *Adv Respir Med* 86(5):205-210.
- 711 15. Ralph AP, *et al.* (2010) A simple, valid, numerical score for grading chest x-ray severity  
712 in adult smear-positive pulmonary tuberculosis. *Thorax* 65(10):863-869.
- 713 16. Anonymous (2020) *WHO consolidated guidelines on tuberculosis: Module 4: Treatment*  
714 *- Drug-resistant tuberculosis treatment*, WHO Guidelines Approved by the Guidelines  
715 Review Committee, Geneva).
- 716 17. Lang M, *et al.* (2019) mlr3: A modern object-oriented machine learning framework in R.  
717 *Journal of Open Source Software* 4(44).
- 718 18. Tverdal A (1986) Body mass index and incidence of tuberculosis. *Eur J Respir Dis*  
719 69(5):355-362.
- 720 19. Lonroth K, Williams BG, Cegielski P, & Dye C (2010) A consistent log-linear  
721 relationship between tuberculosis incidence and body mass index. *Int J Epidemiol*  
722 39(1):149-155.

- 723 20. Rajagopalan S (2001) Tuberculosis and aging: a global health problem. *Clin Infect Dis*  
724 33(7):1034-1039.  
725



## 726 **Supporting Information**

727 **S1 Table. Case characteristics of the cohort of cases selected for evaluation of baseline**  
728 **sputum microscopy status (N = 572).** Case characteristics were compared by baseline sputum  
729 microscopy status. P-values were calculated for continuous variables (age\_of\_onset, bmi,  
730 overall\_timika) using analysis of variance test. P-values for categorical variables  
731 (registration\_date, gender, country, type\_of\_resistance, outcome, current\_smoker) were  
732 calculated using Chi-squared test.  
733

734 **S2 Table. Case characteristics of the cases with CXR radiologist observations used for**  
735 **assessing Timika Score in relation to other case characteristics (N = 1761).** Cases in the TB  
736 portals publicly shared dataset having a CXR with available radiologist were selected. The case  
737 characteristics are shown.  
738

739 **S3 Table. CXR derived features from radiologist observations in the cohort of cases**  
740 **selected for evaluation of baseline sputum microscopy status (N = 572).** The derived features  
741 from the available radiologist observations from the cohort of selected cases used for evaluation  
742 of baseline sputum microscopy status were compared by baseline sputum status. P-values were  
743 calculated for continuous variables (mean\_collapse, mean\_smallcavity, mean\_mediumcavity,  
744 mean\_largecavity, mean\_lowden, mean\_medden, mean\_highden, mean\_smallnodule,  
745 mean\_mediumnodule, mean\_largenodule, mean\_hugenodule,  
746 mean\_lowgroundglassdensityactivefreshnodules, mean\_fibroticnodule, mean\_calcsequella,  
747 overall\_timika) using analysis of variance test. P-values for categorical variables (both\_lungs,  
748 both\_collapse1, both\_smallcavity1, both\_mediumcavity1, both\_largecavity1,  
749 both\_isanylargetcavitymult, both\_multiplecavitiesbeseen, both\_lowden1, both\_medden1,  
750 both\_highden1, both\_smallnodule1, both\_mediumnodule1, both\_largenodule1,  
751 both\_hugenodule1, both\_calcnod, both\_noncalcnod, both\_clustnod, both\_multnod,  
752 both\_lowgroundglassdensityactivefreshnodules1, both\_fibroticnodule1, both\_calcsequella1)  
753 were calculated using Chi-squared test.  
754  
755

756 **S4 Table. Patient and condition ids for the cohort of cases selected for evaluation of**  
757 **baseline sputum microscopy status (N = 572).** A table of patient and condition ids is provided  
758 for the de-identified records that were used for evaluation of baseline sputum microscopy status.  
759

760 **S5 Table. Patient, condition, and imaging ids for the cases having CXRs with radiologist**  
761 **observations used for assessing Timika Score in relation to other case characteristics (N =**  
762 **1761).** A table of patient, condition, and imaging ids with associated relative date of imaging is  
763 provided for the de-identified records that were used for Timika visualizations. For images used  
764 for temporal analysis of changes in Timika Score over time, the temporal\_analysis column  
765 provides a filter equal to “yes” to select only those sets of images.

Overall timika stratified by age\_of\_onset

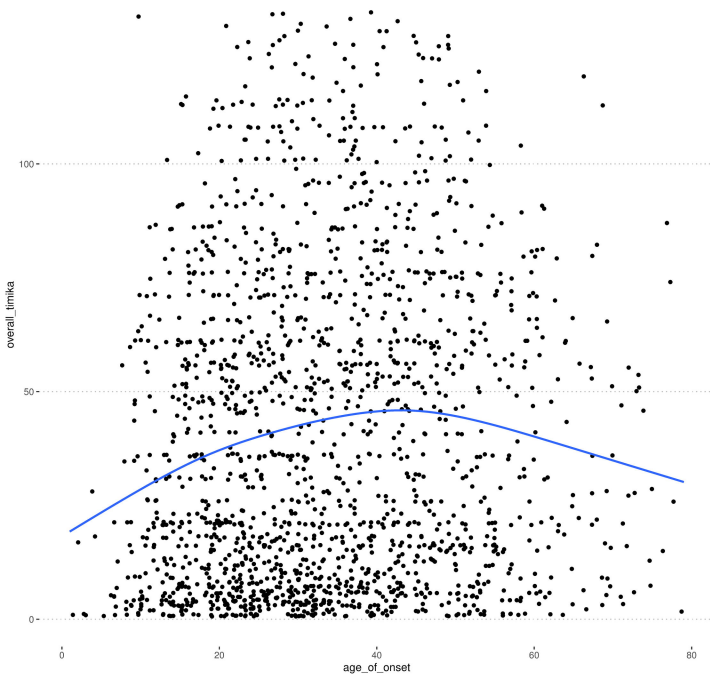

Overall timika stratified by bmi

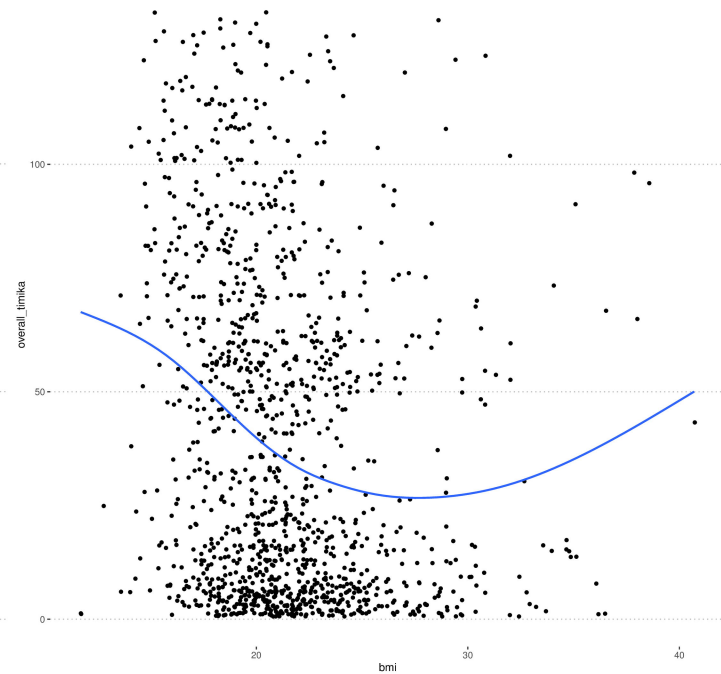

C Overall timika stratified by type\_of\_resistance

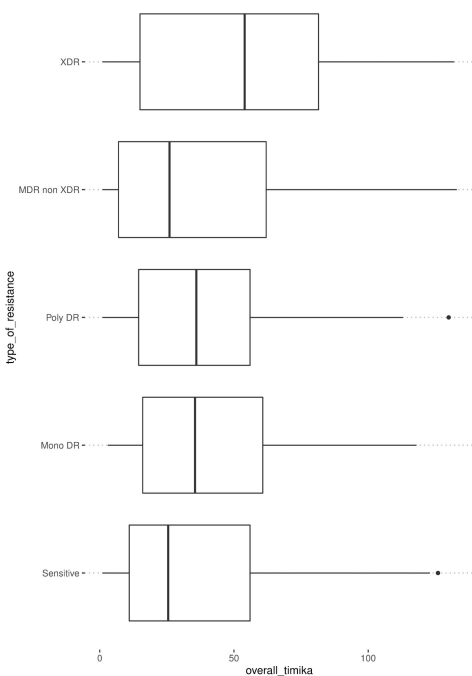

D Overall timika stratified by case\_definition

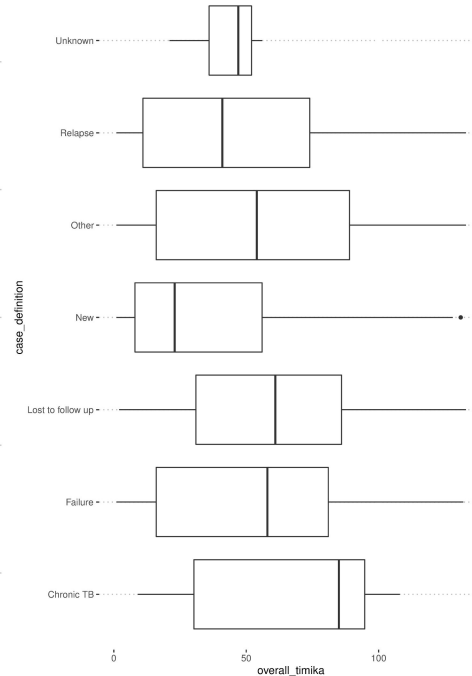

E Overall timika stratified by outcome

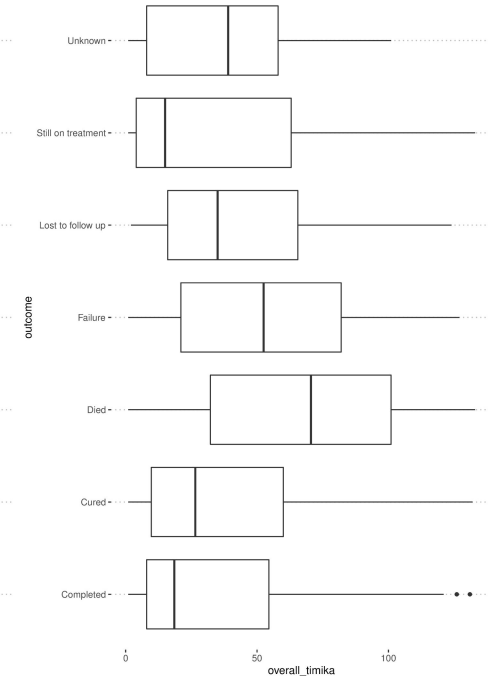

**A** log2 change in timika stratified by age\_of\_onset

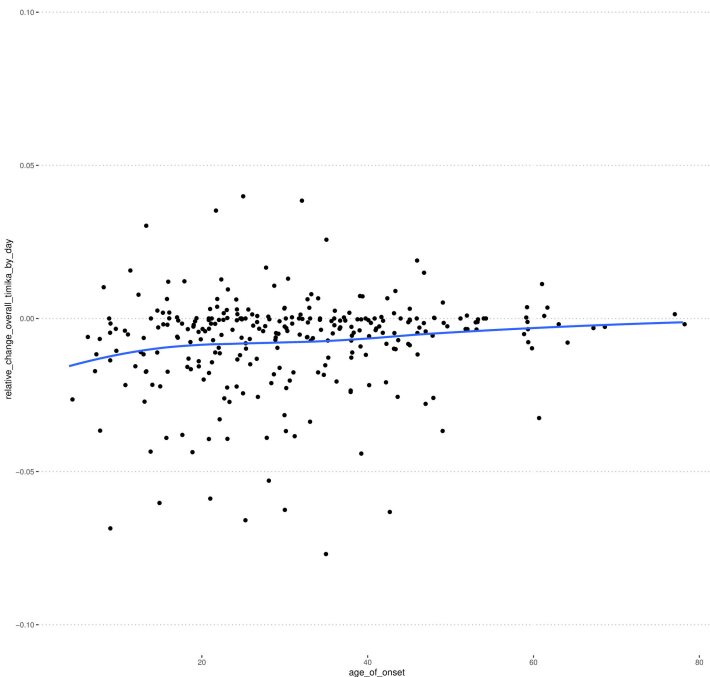

**B** log2 change in timika stratified by bmi

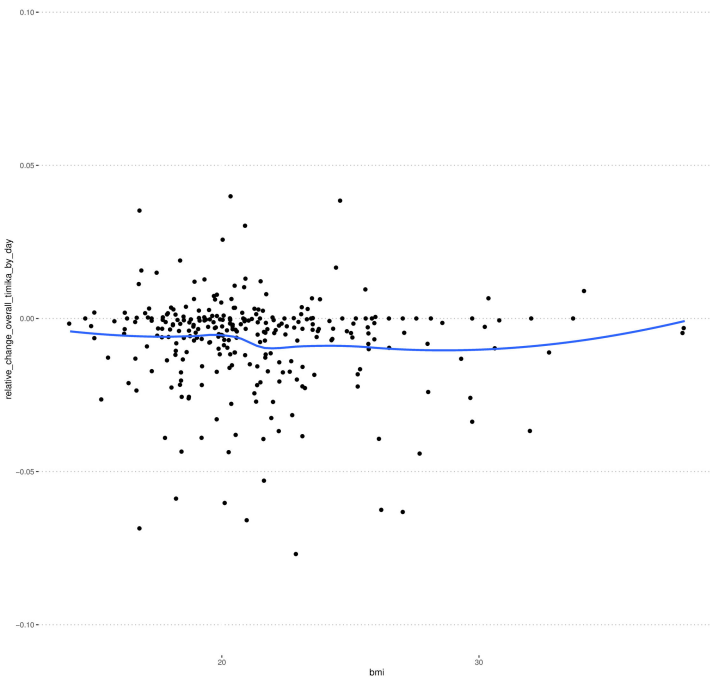

**C** log2 change in timika stratified by type\_of\_resistance

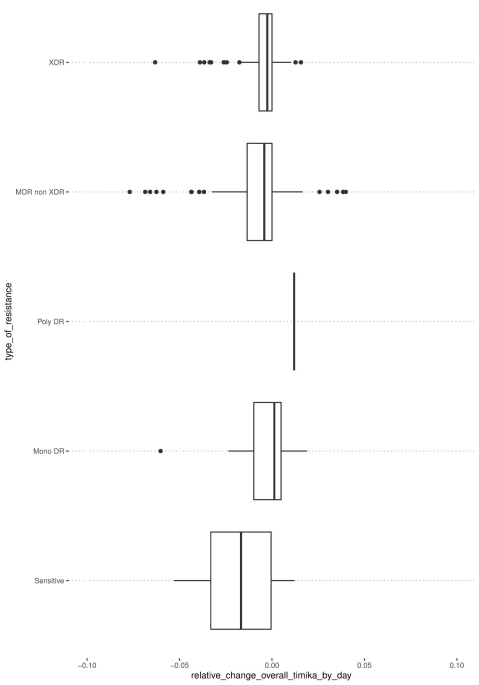

**D** log2 change in timika stratified by case\_definition

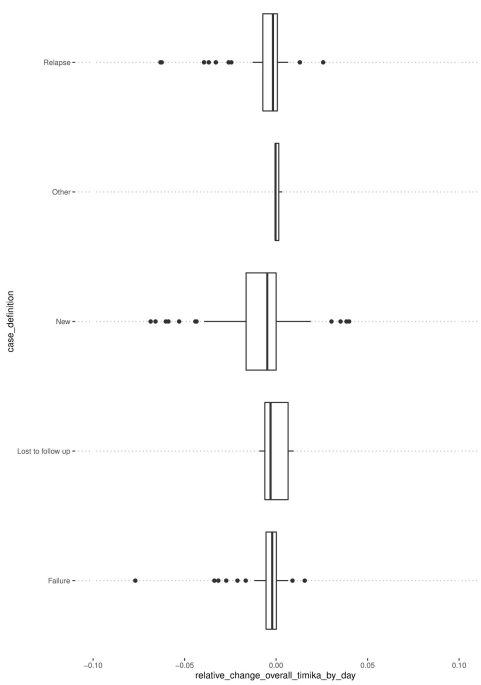

**E** log2 change in timika stratified by outcome

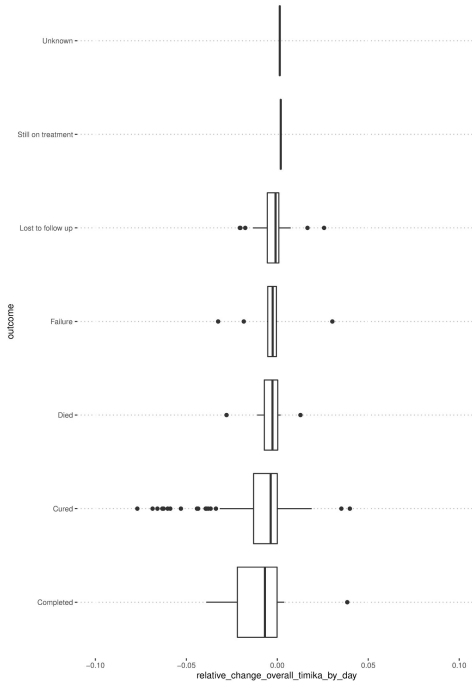

Timika score stratified by sputum smear status of specimen prior to treatment start from CXR within two weeks of specimen collection date

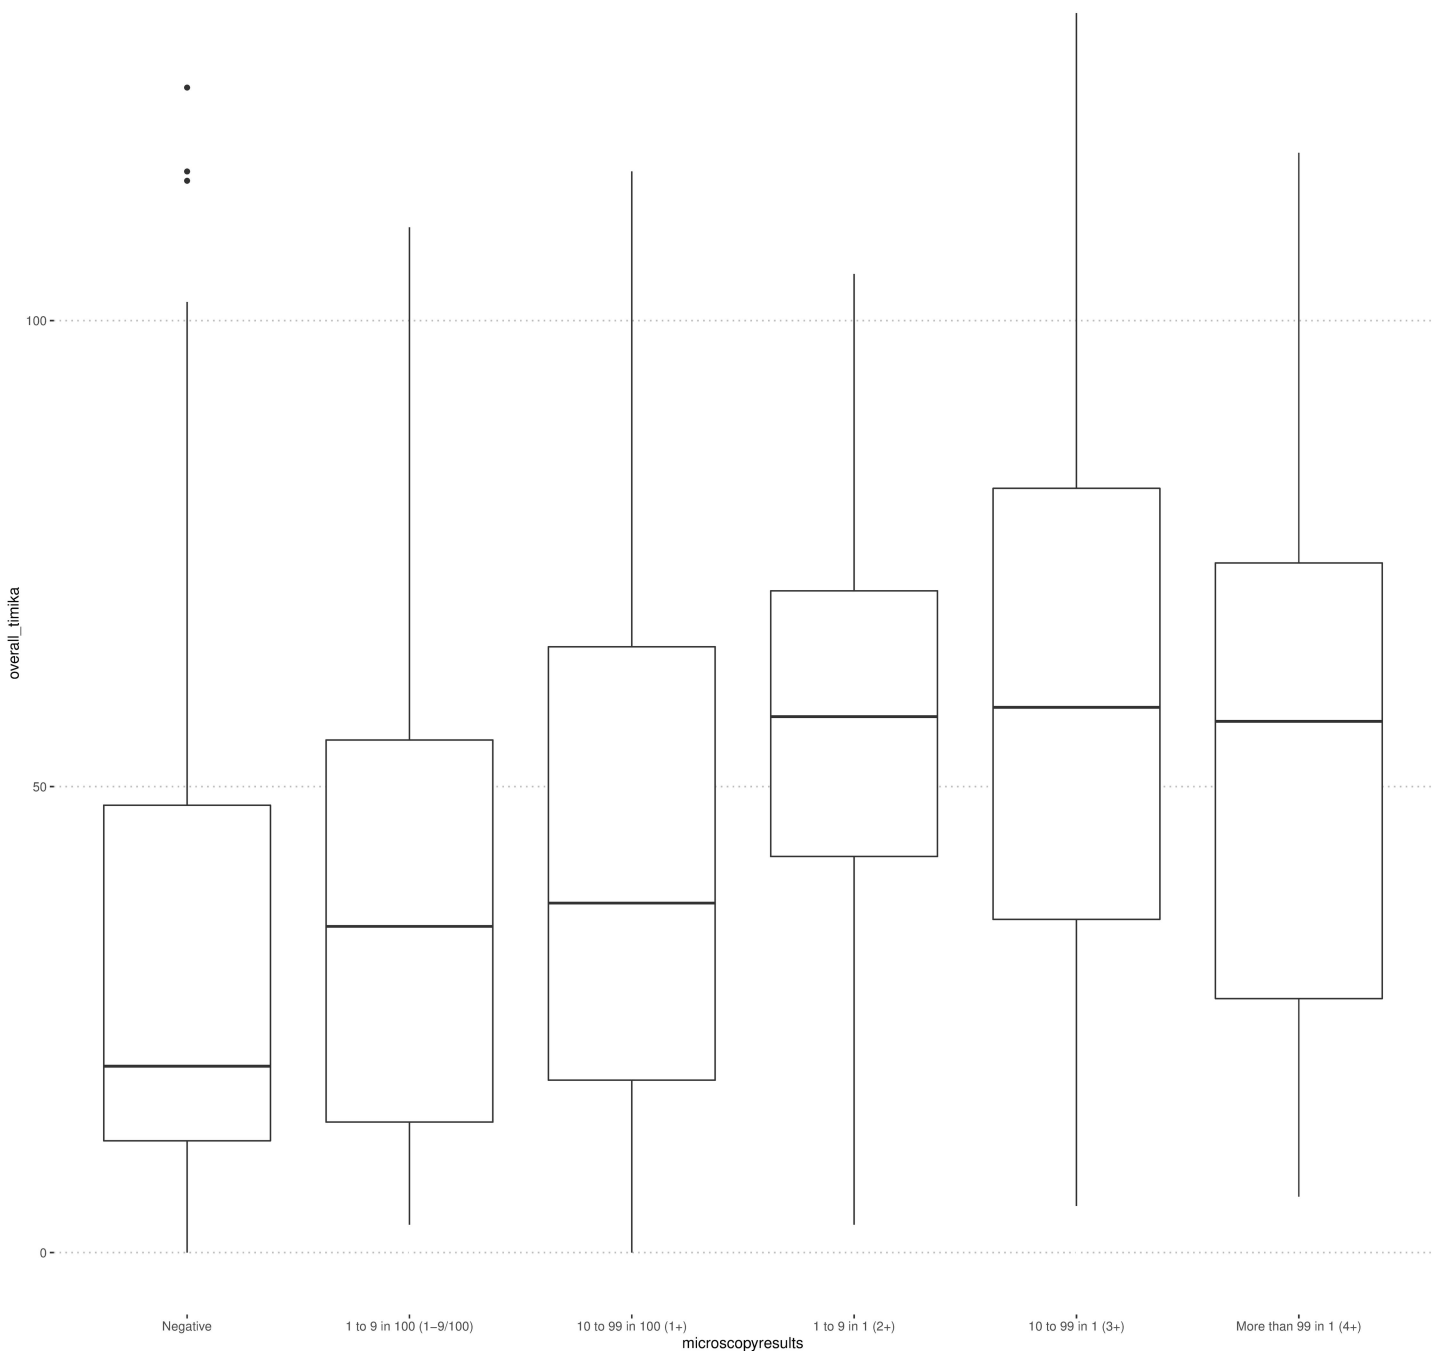

Comparison bootstrapping without replacement (N = 200) from best models

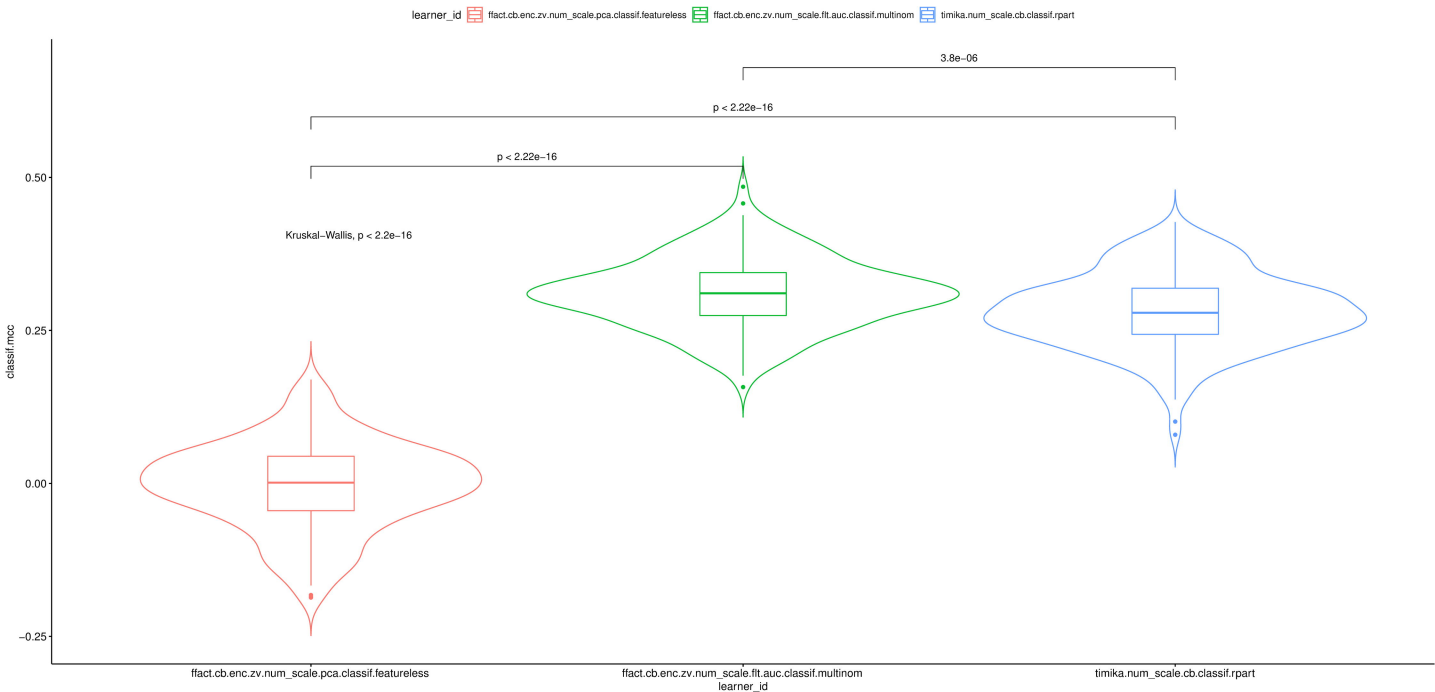

**B** Comparison bootstrapping without replacement (N = 200) from best models

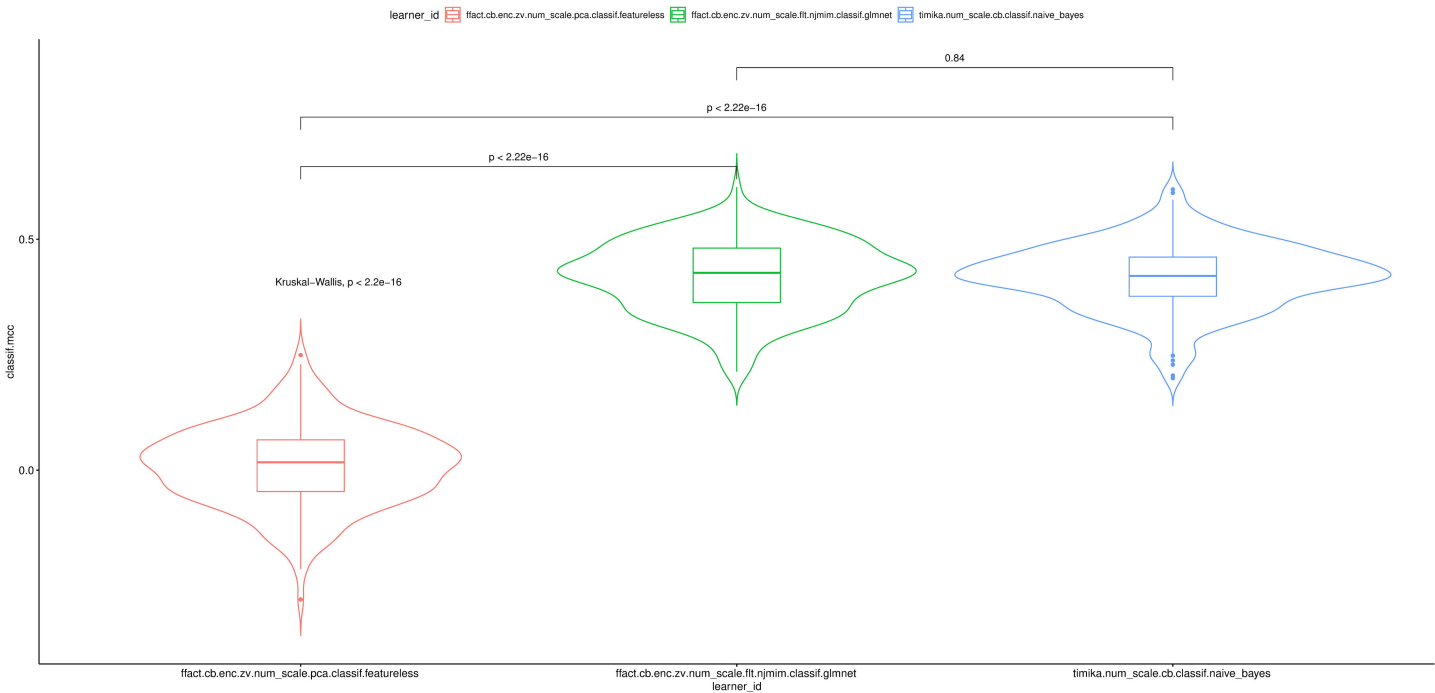

Source: https://www.medrxiv.org/content/medrxiv/early/2022/04/22/2022.04.21.22273975.full.pdf
